# Supplementary material for: Diagenetic Processes and Reservoir Heterogeneity in Salt-Encased Microbial Carbonate Reservoirs (Late Neoproterozoic, Oman)
Source: Hindawi journal article supplement (doi:10.1155/2019/5647857), 2019-11-04
Supplement: f1 [file 5647857.f1.xls]

## Sheet: 0_C isotopes in carbonate 
Well	Sample	Depth (m dd DFE)	Ara cycle	Sequence	Lithofacies Association	Lithofacies	Mineralogy	Description	d13C	Standard Deviation	d18O	Standard Deviation
									[‰, V-PDB]		[‰, V-PDB]
E-4H1	E4-1	4760.61	A2C	S5	Open marine thrombolites (4)	Bthm	Dolomite	Replacive	-2.4	0.023	-4.38	0.07
E-4H1	E4-1	4760.61	A2C	S5	Open marine thrombolites (4)	Bthm	Dolomite	Replacive	-2.43	0.045	-4.45	0.024
E-4H1	E4-1	4760.61	A2C	S5	Open marine thrombolites (4)	Bthm	Dolomite	Replacive	-2.75	0.027	-3.68	0.022
E-4H1	E4-1	4760.61	A2C	S5	Open marine thrombolites (4)	Bthm	Dolomite	Cement (pore)	-1.34	0.024	-3.35	0.06
E-4H1	E4-8	4777.81	A2C	S5	Offshore tranisition zone (6)	Ppm	Dolomite	Replacive	-0.48	0.043	-1.75	0.032
E-4H1	E4-8	4777.81	A2C	S5	Offshore tranisition zone (6)	Ppm	Dolomite	Replacive	-0.48	0.047	-1.76	0.032
E-4H1	E4-11	4783.13	A2C	S4	Slope/basinal mudstones (8)	WMp	Dolomite	Replacive	2.18	0.048	-0.94	0.036
E-4H1	E4-11	4783.13	A2C	S4	Slope/basinal mudstones (8)	WMp	Dolomite	Replacive	2.17	0.049	-0.98	0.037
E-4H1	E4-11	4783.13	A2C	S4	Slope/basinal mudstones (8)	WMp	Dolomite	Replacive	2	0.05	-0.45	0.05
E-4H1	E4-17	4797.34	A2C	S4	Offshore tranisition zone (6)	WMp, Ppm*	Dolomite	Replacive	1.94	0.042	-0.26	0.033
E-4H1	E4-26	4816.07	A2C	S3	Shallow subtidal microbial laminites (3B)	Bml (p)	Dolomite	Replacive	2.65	0.037	-0.88	0.029
E-4H1	E4-31	4830.58	A2C	S2	Open marine thrombolites (4)	Bthm	Dolomite	Replacive	3.37	0.039	-2.75	0.046
E-4H1	E4-31	4830.58	A2C	S2	Open marine thrombolites (4)	Bthm	Dolomite	Replacive	3.29	0.044	-2.81	0.066
E-4H1	E4-32	4832.71	A2C	S2	Open marine thrombolites (4)	Bthm, Brp*	Dolomite	Cement (fracture)	3.04	0.104	-3.2	0.068
E-4H1	E4-32	4832.71	A2C	S2	Open marine thrombolites (4)	Bthm, Brp*	Dolomite	Replacive	3.17	0.05	-2.92	0.062
E-4H1	E4-32	4832.71	A2C	S2	Open marine thrombolites (4)	Bthm, Brp*	Dolomite	Replacive	3.17	0.041	-2.97	0.034
E-4H1	E4-32	4832.71	A2C	S2	Open marine thrombolites (4)	Bthm, Brp*	Dolomite	Replacive	3.04	0.044	-2.87	0.085
E-4H1	E4-33B	4838.5	A2C	S1	Slope breccia (9)	Brp, Mcl*	Dolomite	Replacive	2.32	0.022	-1.4	0.04
E-4H1	E4-33B	4838.5	A2C	S1	Slope breccia (9)	Brp, Mcl*	Dolomite	Replacive	2.25	0.042	-1.41	0.062
E-4H1	E4-35	4843	A2C	S1	Slope breccia (9)	Brp, Mm*	Dolomite	Replacive	3.06	0.06	-2.88	0.089
E-4H1	E4-26	4816.07	A2C	S3	Shallow subtidal microbial laminites (3B)	Bml (p)	Calcite	Cement (pore)	0.62	0.057	-9.08	0.064
E-4H1	E4-26	4816.07	A2C	S3	Shallow subtidal microbial laminites (3B)	Bml (p)	Calcite	Cement (fracture)	0.67	0.033	-10.53	0.023
E-4H1	E4-28	4820.79	A2C	S2	Open marine thrombolites (4)	Bthm	Calcite	De-dolomite	2.46	0.028	-5.39	0.034
E-4H1	E4-28	4820.79	A2C	S2	Open marine thrombolites (4)	Bthm	Calcite	De-dolomite	2.15	0.025	-3.99	0.035
E-9H2	E9-1	4720.7	A2C	S4	Intertidal (3A)	Bml	Dolomite	Replacive	1.47	0.269	-2.56	0.104
E-9H2	E9-1	4720.7	A2C	S4	Intertidal (3A)	Bml	Dolomite	Cement (pore)	1.66	0.179	-3	0.295
E-9H2	E9-1	4720.7	A2C	S4	Intertidal (3A)	Bml	Dolomite	Replacive	1.09	0.029	-2.67	0.032
E-9H2	E9-3	4722.71	A2C	S4	Intertidal (3A)	Bml	Dolomite	Cement (pore)	0.83	0.028	-2.71	0.024
E-9H2	E9-3	4722.71	A2C	S4	Intertidal (3A)	Bml	Dolomite	Replacive	0.68	0.049	-2.55	0.054
E-9H2	E9-3	4722.71	A2C	S4	Intertidal (3A)	Bml	Dolomite	Replacive	1.15	0.035	-2.86	0.055
E-9H2	E9-6	4725.53	A2C	S4	Intertidal (3A)	Bml (t)	Dolomite	Cement (pore)	1.83	0.039	-2.65	0.033
E-9H2	E9-6	4725.53	A2C	S4	Intertidal (3A)	Bml (t)	Dolomite	Replacive	1.9	0.026	-2.64	0.028
E-9H2	E9-6	4725.53	A2C	S4	Intertidal (3A)	Bml (t)	Dolomite	Replacive	1.92	0.036	-2.63	0.025
E-9H2	E9-6	4725.53	A2C	S4	Intertidal (3A)	Bml (t)	Dolomite	Replacive	2.08	0.267	-2.91	0.126
E-9H2	E9-9	4730.15	A2C	S4	Open marine thrombolites (4)	Bthm	Dolomite	Cement (pore)	0.62	0.135	-2.97	0.104
E-9H2	E9-9	4730.15	A2C	S4	Open marine thrombolites (4)	Bthm	Dolomite	Replacive	1.02	0.071	-2.99	0.045
E-9H2	E9-10	4731.84	A2C	S4	Open marine thrombolites (4)	Bthm	Dolomite	Replacive	1.71	0.049	-2.91	0.038
E-9H2	E9-11	4733.43	A2C	S4	Open marine thrombolites (4)	Bthm	Dolomite	Replacive	1.93	0.026	-2.7	0.024
E-9H2	E9-11	4733.43	A2C	S4	Open marine thrombolites (4)	Bthm	Dolomite	Replacive	1.81	0.047	-2.55	0.05
E-9H2	E9-14	4737.52	A2C	S4	Intertidal (3A)	Bml	Dolomite	Replacive	2.14	0.028	-3.1	0.049
E-9H2	E9-16	4741.64	A2C	S4	Shallow subtidal (3B)	Bml (p)	Dolomite	Replacive	1.62	0.049	-1.9	0.086
E-9H2	E9-23	4750.38	A2C	S4	Microbial-bound mudstones (8m)	Mcl	Dolomite	Replacive	2	0.154	-2.93	0.163
E-9H2	E9-23	4750.38	A2C	S4	Microbial-bound mudstones (8m)	Mcl	Dolomite	Replacive	2.2	0.084	-3.2	0.069
E-9H2	E9-24	4751.3	A2C	S4	Offshore transition zone (6)	Ppm	Dolomite	Replacive	1.31	0.087	-0.2	0.091
E-9H2	E9-25	4752.63	A2C	S4	Slope/basinal mudstones (8)	Mfl, Mcl*	Dolomite	Replacive	0.75	0.075	-2.51	0.059
E-9H2	E9-26	4752.63	A2C	S4	Slope/basinal mudstones (8)	Mfl, Mcl*	Dolomite	Replacive	2.03	0.097	-3.24	0.099
E-9H2	E9-26	4752.63	A2C	S4	Slope/basinal mudstones (8)	Mfl, Mcl*	Dolomite	Replacive	2.07	0.056	-3.12	0.049
E-9H2	E9-39	4775.44	A2C	S3	Open marine thrombolites (4)	Bthl	Dolomite	Replacive	3.37	0.059	-4.05	0.035
E-9H2	E9-39	4775.44	A2C	S3	Open marine thrombolites (4)	Bthl	Dolomite	Replacive	3.49	0.052	-3.45	0.045
E-9H2	E9-39	4775.44	A2C	S3	Open marine thrombolites (4)	Bthl	Dolomite	Replacive	3.51	0.037	-3.45	0.082
E-9H2	E9-11	4733.43	A2C	S4	Open marine thrombolites (4)	Bthm	Calcite	Cement (pore)	1.93	0.443	-3.07	0.101
E-9H2	E9-11	4733.43	A2C	S4	Open marine thrombolites (4)	Bthm	Calcite	De-dolomite	1.64		-3.24
E-9H2	E9-21	4747.43	A2C	S4	Microbial-bound mudstones (8m)	Mcl	Calcite	De-dolomite	0.9	0.026	-3.72	0.031
E-9H2	E9-23	4750.38	A2C	S4	Microbial-bound mudstones (8m)	Mcl	Calcite	De-dolomite	0.9	0.048	-4.95	0.061
E-9H2	E9-23	4750.38	A2C	S4	Microbial-bound mudstones (8m)	Mcl	Calcite	Cement (fracture)	1.32	0.036	-4.01	0.047
E-9H2	E9-25	4752.63	A2C	S4	Slope/basinal mudstones (8)	Mfl, Mcl*	Calcite	De-dolomite	1.47	0.122	-2.7	0.104
E-9H2	E9-25	4752.63	A2C	S4	Slope/basinal mudstones (8)	Mfl, Mcl*	Calcite	De-dolomite	1.66		-2.44
E-9H2	E9-25	4752.63	A2C	S4	Slope/basinal mudstones (8)	Mfl, Mcl*	Calcite	De-dolomite	0.5	0.072	-4.31	0.044
E-11H3	E11-3	4657.7	A2C	S4	Open marine thrombolites (4)	Bthl	Dolomite	Replacive	1.84	0.047	-2.77	0.057
E-11H3	E11-3	4657.7	A2C	S4	Open marine thrombolites (4)	Bthl	Dolomite	Replacive	1.9	0.021	-2.8	0.047
E-11H3	E11-7	4664.09	A2C	S3	Open marine thrombolites (4)	Brth	Dolomite	Replacive	1.39	0.037	-2.2	0.055
E-11H3	E11-7	4664.09	A2C	S3	Open marine thrombolites (4)	Brth	Dolomite	Replacive	2.43	0.034	-2.34	0.035
E-11H3	E11-7	4664.09	A2C	S3	Open marine thrombolites (4)	Brth	Dolomite	Replacive	2.01	0.039	-2.29	0.06
E-11H3	E11-7	4664.09	A2C	S3	Open marine thrombolites (4)	Brth	Dolomite	Replacive	2.01	0.058	-2.25	0.063
E-11H3	E11-14	4675.01	A2C	S2	Slope breccia (9)	Brp, Brth*	Dolomite	Replacive	2.81	0.039	-3.17	0.061
G-3H2	G3-4	4941.49	A2C	S4	Offshore transition zone (6)	Ppst, WMp*	Dolomite	Replacive	1.08	0.027	-2.88	0.027
G-3H2	G3-10	4956.48	A2C	S3	Offshore transition zone (6)	Ppst, Brp*	Dolomite	Replacive	2	0.034	-0.75	0.051
G-3H2	G3-10	4956.48	A2C	S3	Offshore transition zone (6)	Ppst, Brp*	Dolomite	Replacive	2	0.024	-0.79	0.037
G-3H2	G3-17	4972.96	A2C	S3	Grainstone shoals or isolated sand sheets (5)	PG (c)	Dolomite	Replacive	2.58	0.026	-2.82	0.036
G-3H2	G3-17	4972.96	A2C	S3	Grainstone shoals or isolated sand sheets (5)	PG (c)	Dolomite	Replacive	2.49	0.031	-2.65	0.043
G-3H2	G3-30	4997.76	A2C	S2	Peritidal (3)	Bml (p), PG*	Dolomite	Cement (pore)	2.26	0.044	-2.95	0.059
G-3H2	G3-30	4997.76	A2C	S2	Peritidal (3)	Bml (p), PG*	Dolomite	Replacive	2.46	0.042	-3.14	0.072
G-3H2	G3-35	5006.81	A2C	S1	Offshore transition zone (6)	WMp	Dolomite	Replacive	1.33	0.128	-3.26	0.128
G-3H2	G3-35	5006.81	A2C	S1	Offshore transition zone (6)	WMp	Dolomite	Replacive	1.55	0.051	-2.62	0.039
G-3H2	G3-41	5020.42	A2C	S1	Salina (2)	Br	Dolomite	Replacive	1.96	0.042	-2.77	0.066
G-3H2	G3-41	5020.42	A2C	S1	Salina (2)	Br	Dolomite	Replacive	2.18	0.168	-2.56	0.189
G-3H2	G3-4	4941.49	A2C	S4	Offshore transition zone (6)	Ppst, WMp*	Calcite	Cement (tension)	0.53	0.027	-4.75	0.02
G-4H1	G4-3A	4946.15	A2C	S4	Offshore transition zone (6)	WMp	Dolomite	Replacive	1.22	0.051	-1.43	0.05
G-4H1	G4-7	4956.15	A2C	S4	Offshore transition zone (6)	WMp	Dolomite	Replacive	1.66	0.034	0.69	0.026
G-4H1	G4-10A	4963.54	A2C	S4	Grainstone shoals or isolated sand sheets (5)	PG	Dolomite	Replacive	1.91	0.024	-0.73	0.037
G-4H1	G4-13	4971.15	A2C	S3	Offshore transition zone (6)	Ppm, WMp*	Dolomite	Replacive	2.54	0.037	-2.22	0.031
G-4H1	G4-15	4976.13	A2C	S3	Open marine thrombolites (4)	Bthm	Dolomite	Replacive	3.08	0.024	-2.4	0.028
G-4H1	G4-15	4976.13	A2C	S3	Open marine thrombolites (4)	Bthm	Dolomite	Replacive	3.1	0.033	-2.44	0.039
G-4H1	G4-16	4978.49	A2C	S3	Open marine thrombolites (4)	Bthl	Dolomite	Replacive	2.91	0.035	-2.77	0.026
G-4H1	G4-16	4978.49	A2C	S3	Open marine thrombolites (4)	Bthl	Dolomite	Replacive	3.06	0.044	-2.59	0.043
G-4H1	G4-20	4988.25	A2C	S2	Open marine thrombolites (4)	Brth	Dolomite	Replacive	1.84	0.022	-2.75	0.029
G-4H1	G4-20	4988.25	A2C	S2	Open marine thrombolites (4)	Brth	Dolomite	Replacive	2.05	0.027	-3.09	0.044
G-4H1	G4-22	4993.52	A2C	S2	Open marine thrombolites (4)	Bthl, Bml*	Dolomite	Replacive	2.53	0.044	-1.78	0.025
G-4H1	G4-26	5001.39	A2C	S2	Offshore transition zone (6)	Ppm	Dolomite	Cement (pore)	2.6	0.051	-1.64	0.089
G-4H1	G4-26	5001.39	A2C	S2	Offshore transition zone (6)	Ppm	Dolomite	Replacive	2.44	0.035	-1.39	0.037
G-4H1	G4-28	5005.6	A2C	S1	Offshore transition zone (6)	WMp, Mcl*	Dolomite	Replacive	2.26	0.029	-2.66	0.019
G-4H1	G4-28	5005.6	A2C	S1	Offshore transition zone (6)	WMp, Mcl*	Dolomite	Replacive	2.26	0.053	-2.38	0.052
G-4H1	G4-28	5005.6	A2C	S1	Offshore transition zone (6)	WMp, Mcl*	Dolomite	Replacive	2.13	0.027	-2.34	0.026
G-4H1	G4-30	5011.4	A2C	S1	Slope breccia (9)	Brp	Dolomite	Replacive	2.76	0.015	-2.86	0.033
G-4H1	G4-30	5011.4	A2C	S1	Slope breccia (9)	Brp	Dolomite	Replacive	2.9	0.021	-2.69	0.035
G-4H1	G4-30	5011.4	A2C	S1	Slope breccia (9)	Brp	Dolomite	Replacive	2.88	0.04	-2.6	0.042
G-4H1	G4-37	5031.25	A2C	S1	Salina (2)	CER	Dolomite	Replacive	2.45	0.038	-2.71	0.035
G-4H1	G4-37	5031.25	A2C	S1	Salina (2)	CER	Dolomite	Replacive	2.51	0.027	-2.69	0.042
G-4H1	G4-37	5031.25	A2C	S1	Salina (2)	CER	Dolomite	Replacive	2.48	0.021	-3.07	0.038
G-4H1	G4-20	4988.25	A2C	S2	Open marine thrombolites (4)	Brth	Calcite	De-dolomite	0.96	0.028	-4.44	0.051
G-4H1	G4-22	4933.52	A2C	S2	Open marine thrombolites (4)	Bthl, Bml*	Calcite	De-dolomite	2.54	0.044	-1.46	0.041
G-4H1	G4-27	5003.26	A2C	S2	Open marine thrombolites (4)	Bthm	Calcite	De-dolomite	1.45	0.046	-4.43	0.029
G-4H1	G4-28	5005.6	A2C	S2	Offshore transition zone (6)	WMp, Mcl*	Calcite	Cement (pore)	1.49	0.032	-3.31	0.064
G-4H1	G4-32	5014.23	A2C	S1	Slope breccia (9)	Brp, Ppst*	Calcite	Cement (fracture)	0.76	0.039	-5.32	0.061
G-8H1	G8-1	4949.19	A2C	S5	Grainsstone shoals or isolated sand sheets (5)	PG (i, p), Brth*	Dolomite	Replacive	2.91	0.041	-1.39	0.042
G-8H1	G8-6	4959.18	A2C	S5	Grainsstone shoals or isolated sand sheets (5)	PG, Bml*	Dolomite	Replacive	2.76	0.044	-2.36	0.032
G-8H1	G8-6	4959.18	A2C	S5	Grainsstone shoals or isolated sand sheets (5)	PG, Bml*	Dolomite	Replacive	2.79	0.024	-2.35	0.025
G-8H1	G8-6	4959.18	A2C	S5	Grainsstone shoals or isolated sand sheets (5)	PG, Bml*	Dolomite	Replacive	2.71	0.041	-2.65	0.043
G-8H1	G8-7	4961.2	A2C	S5	Grainsstone shoals or isolated sand sheets (5)	PG (p, i, c), Bml*	Dolomite	Replacive	2.32	0.035	-3.08	0.061
G-8H1	G8-7	4961.2	A2C	S5	Grainsstone shoals or isolated sand sheets (5)	PG (p, i, c), Bml*	Dolomite	Replacive	2.39	0.039	-2.97	0.03
G-8H1	G8-10	4969.13	A2C	S5	Shallow subtidal (3B)	Bml (p), PG (p, i)*	Dolomite	Replacive	1.87	0.05	-3.41	0.061
G-8H1	G8-10	4969.13	A2C	S5	Shallow subtidal (3B)	Bml (p), PG (p, i)*	Dolomite	Replacive	2.01	0.026	-2.59	0.054
G-8H1	G8-10	4969.13	A2C	S5	Shallow subtidal (3B)	Bml (p), PG (p, i)*	Dolomite	Replacive	1.84	0.035	-3.51	0.055
G-8H1	G8-11	4971.57	A2C	S5	Intertidal (3A)	Bml	Dolomite	Replacive	2.56	0.039	-2.1	0.034
G-8H1	G8-11	4971.57	A2C	S5	Intertidal (3A)	Bml	Dolomite	Replacive	2.49	0.022	-2.13	0.044
G-8H1	G8-11	4971.57	A2C	S5	Intertidal (3A)	Bml	Dolomite	Replacive	2.34	0.047	-2.31	0.039
G-8H1	G8-15	4981.5	A2C	S4	Microbial-bound slope/basinal mudstones (8m)	Mcl	Dolomite	Replacive	2.32	0.026	-2.93	0.027
G-8H1	G8-15	4981.5	A2C	S4	Microbial-bound slope/basinal mudstones (8m)	Mcl	Dolomite	Replacive	2.41	0.033	-2.91	0.053
G-8H1	G8-15	4981.5	A2C	S4	Microbial-bound slope/basinal mudstones (8m)	Mcl	Dolomite	Replacive	2.33	0.027	-2.7	0.051
G-8H1	G8-15	4981.5	A2C	S4	Microbial-bound slope/basinal mudstones (8m)	Mcl	Dolomite	Replacive	2.29	0.038	-2.78	0.054
G-8H1	G8-17	4986.52	A2C	S4	Microbial-bound slope/basinal mudstones (8m)	Mcl	Dolomite	Replacive	2.67	0.047	-3.14	0.045
G-8H1	G8-17	4986.52	A2C	S4	Microbial-bound slope/basinal mudstones (8m)	Mcl	Dolomite	Replacive	2.66	0.063	-2.93	0.053
G-8H1	G8-17	4986.52	A2C	S4	Microbial-bound slope/basinal mudstones (8m)	Mcl	Dolomite	Replacive	2.6	0.045	-3.12	0.034
G-8H1	G8-19	4989.16	A2C	S4	Microbial-bound slope/basinal mudstones (8m)	Mcl	Dolomite	Replacive	2.59	0.068	-2.98	0.074
G-8H1	G8-19	4989.16	A2C	S4	Microbial-bound slope/basinal mudstones (8m)	Mcl	Dolomite	Replacive	2.57	0.056	-2.96	0.048
G-8H1	G8-20	4994.13	A2C	S3	Offshore transition zone (6)	Ppm, Mcl*	Dolomite	Replacive	1.92	0.021	-3.66	0.025
G-8H1	G8-21	4996.48	A2C	S3	Offshore transition zone (6)	Ppm, PG (i, c, p)*	Dolomite	Cement (fracture)	2.54	0.053	-3.11	0.035
G-8H1	G8-21	4996.48	A2C	S3	Offshore transition zone (6)	Ppm, PG (i, c, p)*	Dolomite	Replacive	2.49	0.023	-3.08	0.04
G-8H1	G8-21	4996.48	A2C	S3	Offshore transition zone (6)	Ppm, PG (i, c, p)*	Dolomite	Cement (marine)	2.48	0.035	-3.04	0.037
G-8H1	G8-21	4996.48	A2C	S3	Offshore transition zone (6)	Ppm, PG (i, c, p)*	Dolomite	Cement (marine)	2.44	0.038	-3.03	0.035
G-8H1	G8-23	5001.52	A2C	S3	Grainsstone shoals or isolated sand sheets (5)	PG (i), Bml*	Dolomite	Cement (fracture)	2.49	0.043	-2.8	0.058
G-8H1	G8-23	5001.52	A2C	S3	Grainsstone shoals or isolated sand sheets (5)	PG (i), Bml*	Dolomite	Replacive	2.52	0.039	-2.93	0.033
G-8H1	G8-23	5001.52	A2C	S3	Grainsstone shoals or isolated sand sheets (5)	PG (i), Bml*	Dolomite	Replacive	2.49	0.038	-3.07	0.044
G-8H1	G8-26	5008.83	A2C	S2	Offshore transition zone (6)	Ppm, PG (i)*	Dolomite	Replacive	2.84	0.024	-1.17	0.042
G-8H1	G8-27	5011.52	A2C	S2	Grainsstone shoals or isolated sand sheets (5)	PG (i, p)	Dolomite	Replacive	2.97	0.021	-1.69	0.026
G-8H1	G8-27	5011.52	A2C	S2	Grainsstone shoals or isolated sand sheets (5)	PG (i, p)	Dolomite	Replacive	2.95	0.046	-2	0.089
G-8H1	G8-32	5024.05	A2C	S2	Open marine thrombolites (4)	Brth	Dolomite	Replacive	3.17	0.024	-2.52	0.062
G-8H1	G8-32	5024.05	A2C	S2	Open marine thrombolites (4)	Brth	Dolomite	Replacive	3.17	0.03	-2.69	0.034
G-8H1	G8-33	5026.45	A2C	S2	Open marine thrombolites (4)	Brth	Dolomite	Replacive	3.12	0.03	-2.66	0.029
G-8H1	G8-1	4949.19	A2C	S5	Grainsstone shoals or isolated sand sheets (5)	PG (i, p), Brth*	Calcite	Cement (pore)	2.1	0.017	-2.5	0.036
G-8H1	G8-10	4969.13	A2C	S5	Shallow subtidal (3B)	Bml (p), PG (p, i)*	Calcite	Cement (pore)	1.48	0.024	-3.83	0.021
G-8H1	G8-20	4994.13	A2C	S3	Offshore transition zone (6)	Ppm, Mcl*	Calcite	De-dolomite	1.48	0.019	-3.8	0.036
G-8H1	G8-25	5006.46	A2C	S2	Shallow subtidal (3B)	Bml (p)	Calcite	Cement (pore)	1.09	0.069	-8.67	0.047
