# Supplementary material for: Diagenetic Processes and Reservoir Heterogeneity in Salt-Encased Microbial Carbonate Reservoirs (Late Neoproterozoic, Oman)
Source: Hindawi journal article supplement (doi:10.1155/2019/5647857), 2019-11-04
Supplement: f2 [file 5647857.f2.xls]

## Sheet: Sulfur
Well	Sample	Depth (m dd DFE)	Ara cycle	Sequence	Lithofacies Association	Lithofacies	Mineralogy	Description	d34S
									[‰, V-CDT]
E-4H1	E4-1	4760.61	A2C	S5	Open marine thrombolites (4)	Bthm	Anhydrite	Cement (fracture+pore)	32.5
E-4H1	E4-9	4779.16	A2C	S4	Slope/basinal mudstones (8)	WMp	Anhydrite	Replacive (nodule)	41.7
E-4H1	E4-11	4783.13	A2C	S4	Slope/basinal mudstones (8)	WMp	Anhydrite	Cement (tension gash)	39.6
E-4H1	E4-15	4793.03	A2C	S4	Offshore tranisition zone (6)	Ppst	Anhydrite	Replacive (lath)	38.3
E-4H1	E4-17	4797.34	A2C	S4	Grainstone shoals or isolated sand sheets (5)	PG (o)	Anhydrite	Cement (pore)	38.7
E-4H1	E4-23	4810.06	A2C	S3	Offshore tranisition zone (6)	Ppm, WMp*	Anhydrite	Cement (fracture)	37
E-4H1	E4-24	4812.5	A2C	S3	Offshore tranisition zone (6)	Ppm, WMp*	Anhydrite	Replacive (lath)	39.3
E-4H1	E4-28	4820.79	A2C	S2	Open marine thrombolites (4)	Bthm	Anhydrite	Cement (pore)	39
E-4H1	E4-28	4820.79	A2C	S2	Open marine thrombolites (4)	Bthm	Anhydrite	Replacive (nodule)	41.6
E-4H1	E4-31	4830.58	A2C	S2	Open marine thrombolites (4)	Bthm	Anhydrite	Replacive (rosette)	42.3
E-4H1	E4-33B	4838.5	A2C	S1	Slope breccia (9)	Brp, Mcl*	Anhydrite	Replacive (nodule)	42.5
E-9H2	E9-15	4739.66	A2C	S4	Shallow subtidal (3B)	Bml (p)	Anhydrite	Replacive (nodule)	42.4
E-9H2	E9-17	4743.18	A2C	S4	Shallow subtidal (3B)	Bml (p)	Anhydrite	Replacive (rosettes)	42.8
E-9H2	E9-27	4755.93	A2C	S4	Slope/basinal mudstones (8)	Mfl, Mcl*	Anhydrite	Replacive (rosettes)	41.2
E-9H2	E9-30	4759.09	A2C	S4	Slope/basinal mudstones (8)	Mfl, Mcl*	Anhydrite	Replacive (nodule)	41.7
E-9H2	E9-37	4772.48	A2C	S3	Grainstone shoals or isolated sand sheets (5)	PG (i)	Anhydrite	Replacive (nodule)	42.3
E-9H2	E9-42	4781.08	A2C	S2	Shallow subtidal (3B)	Bml (p)	Anhydrite	Cement (pore)	41.9
E-9H2	E9-42	4781.08	A2C	S2	Shallow subtidal (3B)	Bml (p)	Anhydrite	Replacive (rosettes+laths)	42.2
E-9H2	E9-45	4784.27	A2C	S2	Grainstone shoals or isolated sand sheets (5)	PG (i)	Anhydrite	Replacive (rosettes+laths)	41.4
E-9H2	E9-45	4784.27	A2C	S2	Grainstone shoals or isolated sand sheets (5)	PG (i)	Anhydrite	Replacive (dark nodule)	40.2
E-11H3	E11-1	4630.22	A2C	Floater	Slope breccia (9)	Brp	Anhydrite	Replacive (anphanocryst.)	39.5
E-11H3	E11-5	4661.06	A2C	S4	Open marine thrombolites (4)	Bthl	Anhydrite	Replacive (nodule)	39.8
E-11H3	E11-7	4664.09	A2C	S3	Open marine thrombolites (4)	Brth	Anhydrite	Cement (pore)	40.1
E-11H3	E11-10	4669.07	A2C	S3	Offshore transition zone (6)	WMp	Anhydrite	Replacive (laths)	42.2
E-11H3	E11-10	4669.07	A2C	S3	Offshore transition zone (6)	WMp	Anhydrite	Cement (fracture)	40.7
E-11H3	E11-10	4669.07	A2C	S3	Offshore transition zone (6)	WMp	Anhydrite	Replacive (nodule)	41.9
E-11H3	E11-13	4673.88	A2C	S3	Intertidal (3A)	Bml	Anhydrite	Cement (pore)	39.6
E-11H3	E11-14	4675.01	A2C	S2	Slope breccia (9)	Brp, Brth*	Anhydrite	Cement (fracture)	40.3
G-3H2	G3-4	4941.49	A2C	S4	Offshore transition zone (6)	Ppst, WMp*	Anhydrite	Cement (tension gash)	39.5
G-3H2	G3-4	4941.49	A2C	S4	Offshore transition zone (6)	Ppst, WMp*	Anhydrite	Replacive (nodule)	35.5
G-3H2	G3-10	4956.48	A2C	S3	Offshore transition zone (6)	Ppst, Brp*	Anhydrite	Cement (fracture)	34.5
G-3H2	G3-11	4959.07	A2C	S3	Offshore transition zone (6)	Ppst, Brp*	Anhydrite	Cement (tension gash)	39.3
G-3H2	G3-26	4989.65	A2C	S2	Peritidal (3)	Bml (p)	Anhydrite	Cement (fracture)	41.2
G-3H2	G3-27	4990.1	A2C	S2	Peritidal (3)	Bml (p)	Anhydrite	Replacive (rosettes)	41.4
G-3H2	G3-31	4999.58	A2C	S2	Peritidal (3)	Bml	Anhydrite	Replacive (rosettes)	41.2
G-3H2	G3-31	4999.58	A2C	S2	Peritidal (3)	Bml	Anhydrite	Cement (pore)	41.1
G-3H2	G3-39	5015.17	A2C	S1	Salina (2)	CER	Anhydrite	laminated rock	42.3
G-4H1	G4-1	4941.44	A2C	S5	Peritidal (3)	Bml	Anhydrite	Cement (pore)	39.6
G-4H1	G4-2	4943.26	A2C	S5	Grainstone shoals or isolated sand sheets (5)	PG	Anhydrite	Replacive (nodule)	42.2
G-4H1	G4-3A	4946.15	A2C	S4	Offshore transition zone (6)	WMp	Anhydrite	Displacive (nodule)	42
G-4H1	G4-5	4950.9	A2C	S4	Offshore transition zone (6)	WMp, Ppm*	Anhydrite	Cement (fracture)	42
G-4H1	G4-8	4958.54	A2C	S4	Offshore transition zone (6)	WMp	Anhydrite	Cement (fracture)	41.3
G-4H1	G4-8	4958.54	A2C	S4	Offshore transition zone (6)	WMp	Anhydrite	Replacive (laths)	35.4
G-4H1	G4-10A	4963.54	A2C	S4	Grainstone shoals or isolated sand sheets (5)	PG	Anhydrite	Cement (fracture)	42.4
G-4H1	G4-10B	4963.54	A2C	S4	Grainstone shoals or isolated sand sheets (5)	PG	Anhydrite	Replacive (nodule)	42.6
G-4H1	G4-10B	4963.54	A2C	S4	Grainstone shoals or isolated sand sheets (5)	PG	Anhydrite	Replacive (nodule)	42.9
G-4H1	G4-18	4983.46	A2C	S2	Open marine thrombolites (4)	Brth	Anhydrite	Replacive (complete samle)	40.9
G-4H1	G4-18	4983.46	A2C	S2	Open marine thrombolites (4)	Brth	Anhydrite	Replacive (complete samle)	41.5
G-4H1	G4-19	4986.1	A2C	S2	Offshore transition zone (6)	WMP, Brp*	Anhydrite	Replacive (dark nodule)	39.1
G-4H1	G4-19	4986.1	A2C	S2	Offshore transition zone (6)	WMP, Brp*	Anhydrite	Replacive (rosettes)	40.8
G-4H1	G4-34	5021.12	A2C	S1	Slope breccia (9)	Brp	Anhydrite	Replacive (nodule)	41.3
G-8H1	G8-12	4974.1	A2C	S4	Intertidal (3A)	Bml, PG (p)*	Anhydrite	Replacive (rosettes)	40.6
G-8H1	G8-21	4996.48	A2C	S3	Offshore transition zone (6)	Ppm, PG (i, c, p)*	Anhydrite	Cement (fracture)	37
G-8H1	G8-23	5001.52	A2C	S3	Grainsstone shoals or isolated sand sheets (5)	PG (i), Bml*	Anhydrite	Cement (pore)	39
G-8H1	G8-31	5021.42	A2C	S2	Grainsstone shoals or isolated sand sheets (5)	PG (i, p, c)	Anhydrite	Replacive (dark nodule)	30.7
G-8H1	G8-31	5021.42	A2C	S2	Grainsstone shoals or isolated sand sheets (5)	PG (i, p, c)	Anhydrite	Replacive (nodule)	33.7
G-8H1	G8-32	5024.05	A2C	S2	Open marine thrombolites (4)	Brth	Anhydrite	Cement (fracture)	36.1
