# Supplementary material for: Diagenetic Processes and Reservoir Heterogeneity in Salt-Encased Microbial Carbonate Reservoirs (Late Neoproterozoic, Oman)
Source: Hindawi journal article supplement (doi:10.1155/2019/5647857), 2019-11-04
Supplement: f3 [file 5647857.f3.xls]

## Sheet: E-4H1
X	X	X		X	X	I	E4-1	E4-2	E4-3	E4-4	E4-5	E4-6	E4-7	E4-8	E4-9	E4-10	E4-11 (A)	E4-11 (B)	E4-12	E4-13	E4-14	E4-15	E4-16	E4-17	E4-18	E4-19	E4-20	E4-21	E4-22	E4-23	E4-24	E4-25	E4-26	E4-27	E4-28	E4-29	E4-30	E4-31	E4-32	E4-33A	E4-33B	E4-34	E4-35	E4-36
	Sequence						5	5	5	5	5	5	5	5	4	4	4	4	4	4	4	4	4	4	4	3	3	3	3	3	3	3	3	2	2	2	2	2	2	1	1	1	1	1
	depth (m dd DFE)						4760.61	4762.84	4764.9	4766.47	4767.95	4772.08	4775.31	4777.81	4779.16	4781.35	4783.13	4783.13	4786.43	4787.58	4789.99	4793.03	4795.21	4797.34	4798.58	4802.62	4803.21	4805.87	4808.19	4810.06	4812.5	4815.56	4816.07	4818.92	4820.79	4824.54	4827.58	4830.58	4832.71	4838.5	4838.5	4839.5	4843	4844.07
	Allochems (cryptocrystalline calcite)						0	0	0	0	0	0	0	0	0	0	0	0	0	0	0	0	0	0	0	0	0	0	0	0	0	0	0	0	0	0	0	0	0	0	0	0	0	0
		Skeletal allochems (calcite)					0	0	0	0	0	0	0	0	0	0	0	0	0	0	0	0	0	0	0	0	0	0	0	0	0	0	0	0	0	0	0	0	0	0	0	0	0	0
		Non-skeletal allochems (calcite)					0	0	0	0	0	0	0.318519	0	0	0	0	0	0	0	0	0	0	0	0	0	0	0	0	0	0	0	0	0	0	0	0	0	0	0	0	0	0	0
	Matrix (cryptocrystalline calcite)						0	0	0	0	0	0	0	0	0	0	0	0	0	0	0	0	0	0	0	0	0	0	0	0	0	0	0	0	0	0	0	0	0	0	0	0	0	0
		Micrite (calcite)					0	0	0	0	0	0	0	0	0	0	0	0	0	0	0	0	0	0	0	0	0	0	0	0	0	0	0	0	0	0	0	0	0	0	0	0	0	0
	Allochems (cryptocrystalline dolomite)						0	0	0	0	0	31	25.3371	0	0	0	0	0	0.333333	0	0	0	0	14.6667	0	0.333333	0	0	0	0	0	0	1.66667	0	0	0	2	4.33333	0	0	0	0	1.66667	0
		Skeletal allochems (dolomite)					0	0	0	0	0	0	0	0	0	0	0	0	0	0	0	0	0	0	0	0	0	0	0	0	0	0	0	0	0	0	0	0	0	0	0	0	0	0
		Non-skeletal allochems (dolomite)					0	0	0	0	0	31	25.3371	0	0	0	0	0	0.333333	0	0	0	0	14.6667	0	0.333333	0	0	0	0	0	0	1.66667	0	0	0	2	4.33333	0	0	0	0	1.66667	0
	Matrix (cryptocrystalline dolomite)						0.666667	1.33333	0	2.00013	0.666667	24	23.3368	7	2	24.3333	12.3333	8.66667	9.66667	7.66667	6.33333	10.6667	41	57.3333	10.3333	35.6667	11.3333	6.66667	15	14.6667	40.6667	19.6667	51.3333	2.33333	1.66667	4.33333	10.3333	6.66667	0.333333	3.66667	6.66667	11	11.3333	0
		Micrite					0.666667	1.33333	0	2.00013	0.666667	24	23.3368	7	2	24.3333	12.3333	8.66667	9.66667	7.66667	6.33333	10.6667	41	57.3333	10.3333	35.6667	11.3333	6.66667	15	14.6667	40.6667	19.6667	51.3333	2.33333	1.66667	4.33333	10.3333	6.66667	0.333333	3.66667	6.66667	11	11.3333	0
	Total replacive dolomite						54.6667	51.6667	75.6667	70.6713	82.6667	4.66667	6.33427	84.3333	47	67	75	81	86.3333	48	86.6667	76.6667	49.3333	0	73	53.3333	61.3333	76.6667	70.3333	63.3333	50.6667	68.3333	26.6667	12.3333	14	68.6667	56.6667	46.6667	61.6667	65.6667	50.6667	49	50	35
		Microcrystalline dolomite					4	12.3333	8	10.0007	12.3333	4	2.33368	40.6667	34.3333	49.3333	43	15.3333	51	26.6667	44.6667	57.3333	33.3333	0	64.3333	5.33333	13	16.6667	26.6667	33	3.33333	9.66667	18	2.33333	0.333333	6	13.6667	9.66667	1	20	20.3333	17.3333	4.33333	3
		Planar dolomite					8.33333	10.3333	8	6.33375	13	0	0.333383	1.33333	0.333333	0.666667	3	23.3333	2.33333	1.33333	4	1.33333	0.666667	0	0	8.66667	7.33333	5.66667	3	1	1.33333	2	1.33333	0.333333	1.33333	8.66667	4.66667	6.66667	12.6667	0.666667	2.66667	3	16.3333	2
			Planar-s				6.33333	3.33333	6.66667	5.00033	8	0	0	1	0.333333	0.666667	3	19	2.33333	1.33333	3.33333	1.33333	0.666667	0	0	4.33333	6.66667	3.66667	2.33333	0.666667	0	1.66667	0	0	0	7.33333	3.66667	5	9.66667	0.666667	2.66667	3	11.3333	1.66667
			Planar-e				2	3	1.33333	1.33342	5	0	0.333383	0.333333	0	0	0	0	0	0	0.666667	0	0	0	0	0	0.666667	1.33333	0.666667	0.333333	0	0.333333	0	0	0	1.33333	1	1.66667	3	0	0	0	5	0.333333
			Planar-p				0	4	0	0	0	0	0	0	0	0	0	4.33333	0	0	0	0	0	0	0	4.33333	0	0.666667	0	0	1.33333	0	1.33333	0.333333	1.33333	0	0	0	0	0	0	0	0	0
		Non-planar dolomite					42.3333	29	59.6667	54.3369	57.3333	0.666667	3.66721	42.3333	12.3333	17	29	42.3333	33	20	38	18	15.3333	0	8.66667	39.3333	41	54.3333	40.6667	29.3333	46	56.6667	7.33333	9.66667	12.3333	54	38.3333	30.3333	48	45	27.6667	28.6667	29.3333	30
			Non-planar-a				42.3333	29	59.6667	54.3369	57.3333	0.333333	3.66721	42.3333	12.3333	17	29	29.6667	33	20	38	18	11.3333	0	8.66667	28	41	53.6667	40.3333	29.3333	26.6667	53.3333	0.333333	1	8	54	37.6667	29.3333	45.6667	42.6667	26	26.3333	29.3333	26.6667
			Non-planar-p				0	0	0	0	0	0.333333	0	0	0	0	0	12.6667	0	0	0	0	4	0	0	11.3333	0	0.666667	0.333333	0	19.3333	3.33333	7	8.66667	4.33333	0	0.666667	1	2.33333	2.33333	1.66667	2.33333	0	3.33333
			Saddle dolomite				0	0	0	0	0	0	0	0	0	0	0	0	0	0	0	0	0	0	0	0	0	0	0	0	0	0	0	0	0	0	0	0	0	0	0	0	0	0
	Dolomite cements						12.6667	5.66667	0	0.660174	0	6.66667	5.33413	0	0	0	0.333333	0	0.333333	0.666667	0	0	0	8	0	0.333333	1	0.333333	0.333333	0	0.666667	0	2	0	2	9.33333	4	6.33333	15.3333	0	1.66667	0.666667	4.66667	0
		Pore-filling planar					7	2	0	0.326819	0	0	0	0	0	0	0	0	0	0	0	0	0	0	0	0	0	0	0.333333	0	0	0	0	0	1.33333	5.66667	3	1.66667	9.66667	0	0	0	3.33333	0
		Pore-filling non-planar					5.66667	3.66667	0	0.333355	0	0	0.333383	0	0	0	0	0	0	0	0	0	0	0	0	0	0	0.333333	0	0	0	0	0	0	0.666667	3.66667	1	1.33333	5.66667	0	0	0	1.33333	0
		Overgrowth					0	0	0	0	0	6.66667	5.00074	0	0	0	0.333333	0	0.333333	0.333333	0	0	0	8	0	0.333333	1	0	0	0	0.666667	0	2	0	0	0	0	3.33333	0	0	1.66667	0.333333	0	0
		Fracture-filling					0	0	0	0	0	0	0	0	0	0	0	0	0	0.333333	0	0	0	0	0	0	0	0	0	0	0	0	0	0	0	0	0	0	0	0	0	0.333333	0	0
	Gypsum/Anhydrite						17.3333	2.66667	7.33333	6.00039	6	28.3333	28.3375	2	47.3333	6	6.33333	5	3.33333	41.6667	4.33333	10	5.66667	6	2.33333	2	21.3333	7.66667	10	18	7	5.33333	3.33333	36.3333	11.3333	5.66667	10	16.3333	3	29.3333	33.3333	38.3333	2.33333	65
		Replacive laths					2	1.33333	2.66667	2.00013	2	15.3333	17.6693	1	5	6	1.33333	2	2.66667	3.33333	2.66667	6	4.66667	0	1.33333	1.33333	6.66667	2.66667	3.33333	4	4.33333	0	0	2.66667	2.66667	3	2.33333	3.33333	0	0	9.66667	8.66667	0	9.33333
		Replacive/displacive nodules					8.66667	0	2.33333	0	1.33333	0.333333	1.33353	0.333333	40.6667	0	0	0	0	38	0	0	0	0	0	0	10.3333	4.33333	5	3	1	3.66667	0	28.3333	4.33333	0.333333	3.66667	10.6667	0	10.3333	21.3333	16.6667	0	50.6667
		Pore filling					6.66667	1.33333	2.33333	4.00026	2.66667	11.6667	9.33472	0.666667	1.33333	0	0	1.33333	0.666667	0	0.666667	2	1	6	1	0.333333	3.33333	0	1	2	0.666667	1.33333	2	5.33333	1.33333	2.33333	4	2	2.33333	5	0	7.33333	2.33333	5
		Fracture-filling					0	0	0	0	0	0	0	0	0	0	0	0	0	0.333333	0	0	0	0	0	0	0	0	0	0	0	0	0	0	0	0	0	0	0	0	0	0.333333	0	0
	Halite						0	27.6667	0	0	0	0	0	0	0	0	0.333333	0	0	0	0	0	0	0	4.33333	0	0	0	0	0	0	0	0	0	0	0	0	0	0	0	0	0	0	0
		Replacive					0	0	0	0	0	0	0	0	0	0	0	0	0	0	0	0	0	0	0	0	0	0	0	0	0	0	0	0	0	0	0	0	0	0	0	0	0	0
		Pore filling					0	21.6667	0	0	0	0	0	0	0	0	0.333333	0	0	0	0	0	0	0	1	0	0	0	0	0	0	0	0	0	0	0	0	0	0	0	0	0	0	0
		Fracture-filling					0	6	0	0	0	0	0	0	0	0	0	0	0	0	0	0	0	0	3.33333	0	0	0	0	0	0	0	0	0	0	0	0	0	0	0	0	0	0	0
	Calcite						0	0	0	0	0	0	0	0	0	0	0	0	0	0	0	0	0	0	0	0	0	0	0	0	0	4	13.3333	47.3333	70.3333	0	0.333333	0	13.6667	0	0	0	0	0
		Neomorphic/Replacive (D-dolomite)					0	0	0	0	0	0	0	0	0	0	0	0	0	0	0	0	0	0	0	0	0	0	0	0	0	4	2	47.3333	65.6667	0	0	0	13.6667	0	0	0	0	0
		Pore-filling					0	0	0	0	0	0	0	0	0	0	0	0	0	0	0	0	0	0	0	0	0	0	0	0	0	0	5.66667	0	1.66667	0	0.333333	0	0	0	0	0	0	0
		Fracture-filling					0	0	0	0	0	0	0	0	0	0	0	0	0	0	0	0	0	0	0	0	0	0	0	0	0	0	5.66667	0	3	0	0	0	0	0	0	0	0	0
	Quartz						2.66667	0.333333	15	4.00026	0	0.333333	0	0	0	0	0	0	0	0	0.333333	0	0	0	0	0	3	1	0	0	0	0	0	0	0	0	0	0	0	0	0	0	0	0
		Replacive					2.66667	0	9	2.33349	0	0.333333	0	0	0	0	0	0	0	0	0	0	0	0	0	0	1.33333	0	0	0	0	0	0	0	0	0	0	0	0	0	0	0	0	0
		Pore-filling					0	0.333333	6	1.33342	0	0	0	0	0	0	0	0	0	0	0.333333	0	0	0	0	0	1.66667	0.333333	0	0	0	0	0	0	0	0	0	0	0	0	0	0	0	0
		Fracture-filling					0	0	0	0.333355	0	0	0	0	0	0	0	0	0	0	0	0	0	0	0	0	0	0.666667	0	0	0	0	0	0	0	0	0	0	0	0	0	0	0	0
	Pyrite						0	0	0	0	0	0	0	0	0	0	0	0	0	0	0	0	0	0	0	0	0	0	0	0	0	0	0	0	0	0	0	0	0	0	0	0	0	0
		Replacive					0	0	0	0	0	0	0	0	0	0	0	0	0	0	0	0	0	0	0	0	0	0	0	0	0	0	0	0	0	0	0	0	0	0	0	0	0	0
		Cement					0	0	0	0	0	0	0	0	0	0	0	0	0	0	0	0	0	0	0	0	0	0	0	0	0	0	0	0	0	0	0	0	0	0	0	0	0	0
	Residual hydrocarbon						0	0	0.666667	1.33342	0	3.33333	0.333383	1.33333	3	2.66667	2.66667	0	0	0	1.33333	0.666667	4	2.66667	0	0	0.333333	2	2	0.666667	0.666667	0	0	0.333333	0.333333	0	0	0	1	0.333333	6	0.666667	0	0
		Pore Filling					0	0	0	0.333355	0	0.333333	0	0	2	0	0	0	0	0	0.666667	0	0.666667	0	0	0	0.333333	0.333333	2	0.666667	0.333333	0	0	0	0	0	0	0	1	0	1.66667	0.333333	0	0
		Grain Rimming					0	0	0	0	0	0	0	0	0	0	0	0	0	0	0	0	0	0	0	0	0	0.333333	0	0	0	0	0	0.333333	0	0	0	0	0	0	1.33333	0	0	0
		Fracture Filling					0	0	0	0	0	0	0	1	0	0	0	0	0	0	0	0	0	0	0	0	0	0	0	0	0	0	0	0	0	0	0	0	0	0	0	0	0	0
		Stylolite					0	0	0.666667	1.00007	0	3	0.333383	0.333333	1	2.66667	2.66667	0	0	0	0.666667	0.666667	3.33333	2.66667	0	0	0	1.33333	0	0	0.333333	0	0	0	0.333333	0	0	0	0	0.333333	3	0.333333	0	0
	Total modal porosity						12	10.6667	1.33333	15.3343	10.6667	1.66667	10.6683	5.33333	0.666667	0	3	5.33333	0	2	1	2	0	11.3333	10	8.33333	1.66667	5.66667	2.33333	3.33333	0.333333	2.66667	1.66667	1.33333	0.333333	12	16.6667	19.6667	5	1	1.66667	0.333333	30	0
		Primary macroporosity					0	0	0	0	0	0.666667	1.00015	0	0	0	0	0	0	0	0	0	0	3.33333	0	0	0	0	0	0	0	0	0	0	0	0	0	0	0	0	0	0	0	0
			Primary interparticle				0	0	0	0	0	0.666667	1.00015	0	0	0	0	0	0	0	0	0	0	0	0	0	0	0	0	0	0	0	0	0	0	0	0	0	0	0	0	0	0	0
			Fenestral				0	0	0	0	0	0	0	0	0	0	0	0	0	0	0	0	0	0	0	0	0	0	0	0	0	0	0	0	0	0	0	0	0	0	0	0	0	0
			Primary intraparticle				0	0	0	0	0	0	0	0	0	0	0	0	0	0	0	0	0	3.33333	0	0	0	0	0	0	0	0	0	0	0	0	0	0	0	0	0	0	0	0
		Secondary macroporosity					12	10.6667	1.33333	15.3343	10.6667	1	9.6681	5.33333	0.666667	0	3	5.33333	0	2	1	2	0	8	10	8.33333	1.66667	5.66667	2.33333	3.33333	0.333333	2.66667	1.66667	1.33333	0.333333	12	16.6667	19.6667	5	1	1.66667	0.333333	30	0
			Intercrystalline				1	3	0.333333	2.00013	4	0	0.333383	0	0	0	0	0	0	0	0	0	0	0	0	1.66667	0.333333	2.33333	2.33333	1.33333	0	0	0	1	0	3.33333	2.66667	3	0	0	0.666667	0	5.33333	0
			Mouldic				0	0	0	0	0	1	5.66751	0	0	0	0	0	0	0	0	0	0	4.66667	0	0.333333	0	0	0	0	0	0	0.333333	0	0.333333	0	2.33333	0.666667	0	0	0	0	1.66667	0
				Isolated			0	0	0	0	0	1	5.66751	0	0	0	0	0	0	0	0	0	0	4.66667	0	0.333333	0	0	0	0	0	0	0.333333	0	0.333333	0	2.33333	0.666667	0	0	0	0	1	0
				Connected			0	0	0	0	0	0	0	0	0	0	0	0	0	0	0	0	0	0	0	0	0	0	0	0	0	0	0	0	0	0	0	0	0	0	0	0	0.666667	0
			Vugs				8.33333	3.66667	0.666667	11.0007	6.66667	0	3.66721	3.66667	0	0	3	4.66667	0	1	0	2	0	2.66667	7.66667	6	0.333333	3	0	0.666667	0	2.33333	1.33333	0.333333	0	8.33333	11.6667	13.3333	4.66667	0	0.333333	0	22.6667	0
				Isolated			2.33333	1	0.666667	8.33388	5.33333	0	3.66721	0.333333	0	0	3	2.66667	0	0	0	1.33333	0	2.66667	3	3	0.333333	1.33333	0	0.666667	0	2	1.33333	0.333333	0	4.66667	8	3.66667	1	0	0.333333	0	6.66667	0
				Touching			6	2.66667	0	2.66684	1.33333	0	0	3.33333	0	0	0	2	0	1	0	0.666667	0	0	4.66667	3	0	1.66667	0	0	0	0.333333	0	0	0	3.66667	3.66667	9.66667	3.66667	0	0	0	16	0
			Secondary intraparticle				0.666667	0	0.333333	0	0	0	0	0	0	0	0	0	0	0	0	0	0	0	0	0	0	0	0	0	0	0	0	0	0	0	0	1	0	0	0	0	0	0
			Fractures (macroporosity)				0	3	0	2.00013	0	0	0	1.66667	0.666667	0	0	0.333333	0	0.666667	0.666667	0	0	0.666667	1	0	1	0	0	1	0.333333	0.333333	0	0	0	0	0	0	0	1	0	0	0	0
			Channel				2	1	0	0.333355	0	0	0	0	0	0	0	0.333333	0	0.333333	0.333333	0	0	0	1.33333	0.333333	0	0.333333	0	0.333333	0	0	0	0	0	0.333333	0	1.66667	0.333333	0	0.666667	0.333333	0.333333	0

## Sheet: E-5H1
																					v
X	X	X	X			I	E5-1	E5-2	E5-3	E5-4	E5-5	E5-6	E5-7	E5-8	E5-9	E5-10	E5-11	E5-12	E5-13	E5-14	E5-15	E5-16	E5-17	E5-18	E5-19	E5-20	E5-21	E5-22	E5-23	E5-24	E5-25	E5-26	E5-27	E5-28	E5-29
	Sequence						5	5	4	4	4	4	4	4	4	3	3	3	3	3	3	2	2	2	2	2	2	2	2	2	2	1	1	1	1
	depth (m dd DFE)						4760.46	4764.65	4766.81	4770.38	4772.48	4775.75	4779.73	4782.35	4783.6	4787.06	4790.3	4792.06	4795.92	4799.02	4802.1	4804.97	4809.01	4811.18	4814.78	4817.64	4819.67	4824.02	4826.79	4829.69	4834.09	4838.77	4841.62	4845.17	4848.98
	Allochems (cryptocrystalline calcite)						0	0	0	0	0	0	0	0	0	0	0	0	0	0	0	0	0	0	0	0	0	0	0	0	0	0	0	0	0
		Skeletal allochems (calcite)					0	0	0	0	0	0	0	0	0	0	0	0	0	0	0	0	0	0	0	0	0	0	0	0	0	0	0	0	0
		Non-skeletal allochems (calcite)					0	0	0	0	0	0	0	0	0	0	0	0	0	0	0	0	0	0	0	0	0	0	0	0	0	0	0	0	0
	Matrix (cryptocrystalline calcite)						0	0	0	0	0	0	0	0	0	0	0	0	0	0	0	0	0	0	0	0	0	0	0	0	0	0	0	0	0
		Micrite (calcite)					0	0	0	0	0	0	0	0	0	0	0	0	0	0	0	0	0	0	0	0	0	0	0	0	0	0	0	0	0
	Allochems (cryptocrystalline dolomite)						0	0	0	0	0	0	0.333333	0	0	0	0	0	0	0	0	0	0	0	0	0	0	0	0	0	0	0	0	0	0
		Skeletal allochems (dolomite)					0	0	0	0	0	0	0	0	0	0	0	0	0	0	0	0	0	0	0	0	0	0	0	0	0	0	0	0	0
		Non-skeletal allochems (dolomite)					0	0	0	0	0	0	0.333333	0	0	0	0	0	0	0	0	0	0	0	0	0	0	0	0	0	0	0	0	0	0
	Matrix (cryptocrystalline dolomite)						0	3	3.33333	0	0	5.33333	7.66667	5.33333	2.66667	1	0	1	0	0	0	0	0	1	0.333333	0.333333	0	0	0	0	2.33333	3.33333	10.6667	10.3333	12.6667
		Micrite					0	3	3.33333	0	0	5.33333	7.66667	5.33333	2.66667	1	0	1	0	0	0	0	0	1	0.333333	0.333333	0	0	0	0	2.33333	3.33333	10.6667	10.3333	12.6667
	Total replacive dolomite						54.6667	70.3333	62	85	54.6667	73.3333	67	41	35	71	53.3333	71.3333	72.3333	50	6.33333	11	20.3333	70	72	69	38.6667	68.6667	80.3333	80.6667	59	51	38.3333	11	66
		Microcrystalline dolomite					0.666667	5.33333	4	4.33333	0.333333	3.66667	11.6667	11.3333	0.333333	1	0.666667	10.6667	4.33333	1	0	0	3	3	0.333333	4.33333	6.33333	1	7	8.33333	17	33.6667	24	3.33333	28.3333
		Planar dolomite					21	15.6667	7.66667	22.3333	23	10	3.33333	1	6	24.3333	27.3333	22.6667	27.3333	24.6667	4.33333	3.33333	6	10.3333	14.6667	5.33333	7.66667	28	22	10.6667	5	0.333333	0.666667	0	2
			Planar-s				19.6667	15.6667	7.66667	22.3333	22.6667	10	3.33333	1	6	23.3333	25.3333	22.6667	23.6667	22.3333	2	1.66667	5.66667	10.3333	13.6667	5	6.33333	27.3333	21	10.6667	5	0	0.666667	0	2
			Planar-e				1.33333	0	0	0	0.333333	0	0	0	0	1	2	0	3.66667	2.33333	2.33333	0.333333	0.333333	0	1	0.333333	1.33333	0.666667	1	0	0	0	0	0	0
			Planar-p				0	0	0	0	0	0	0	0	0	0	0	0	0	0	0	1.33333	0	0	0	0	0	0	0	0	0	0.333333	0	0	0
		Non-planar dolomite					33	49.3333	50.3333	58.3333	31.3333	59.6667	52	28.6667	28.6667	45.6667	25.3333	38	40.6667	24.3333	2	7.66667	11.3333	56.6667	57	59.3333	24.6667	39.6667	51.3333	61.6667	37	17	13.6667	7.66667	35.6667
			Non-planar-a				33	49.3333	50.3333	58.3333	31.3333	59.6667	52	28.6667	26.3333	45.6667	25.3333	38	40.6667	24.3333	2	5.33333	11	56.6667	57	59.3333	24.6667	39.6667	51.3333	61.6667	37	13	8.33333	1	35.6667
			Non-planar-p				0	0	0	0	0	0	0	0	2.33333	0	0	0	0	0	0	2.33333	0.333333	0	0	0	0	0	0	0	0	4	5.33333	6.66667	0
			Saddle dolomite				0	0	0	0	0	0	0	0	0	0	0	0	0	0	0	0	0	0	0	0	0	0	0	0	0	0	0	0	0
	Dolomite cements						3.33333	8.33333	5.33333	1.66667	0.333333	0	0.333333	0	0	5.66667	15.6667	9	11	21	4.33333	1.33333	0.666667	10.3333	12.6667	12.3333	14	16.3333	0.333333	6.33333	2.66667	0	0	0	0
		Pore-filling planar					2.33333	4.33333	3.33333	1.66667	0.333333	0	0	0	0	4	12.6667	6	3	16.6667	2.33333	0.666667	0.666667	3	9	8	7.66667	13	0	4.66667	2	0	0	0	0
		Pore-filling non-planar					0.333333	3	1.66667	0	0	0	0	0	0	1.33333	2.33333	1	1	3.66667	0.333333	0	0	7.33333	3.66667	4.33333	6.33333	3.33333	0.333333	1.66667	0.666667	0	0	0	0
		Overgrowth					0.666667	1	0.333333	0	0	0	0.333333	0	0	0.333333	0.666667	2	7	0.666667	1.66667	0.666667	0	0	0	0	0	0	0	0	0	0	0	0	0
		Fracture-filling					0	0	0	0	0	0	0	0	0	0	0	0	0	0	0	0	0	0	0	0	0	0	0	0	0	0	0	0	0
	Gypsum/Anhydrite						2.33333	5.66667	16	3.33333	43.3333	9.66667	22	49	53.6667	15	22.3333	8	6.33333	13	3.33333	3.33333	2	3.33333	3.33333	0	34.3333	2.66667	2	0	20	41	50.3333	71	14.6667
		Replacive laths					1.33333	2.33333	1.66667	1.66667	3.33333	6.66667	2	1	1.33333	3	2.66667	3	1.33333	1.66667	1	2	0.666667	2	0.666667	0	2.66667	0.333333	1	0	0.333333	7	16.6667	0.333333	14
		Replacive/displacive nodules					0	0.333333	11.3333	0.333333	34	0.666667	18.6667	47.6667	46.3333	6	12.3333	0.333333	4	7.66667	0	0	0	0	0	0	30	0.666667	0.333333	0	0	29.3333	32.3333	70.3333	0
		Pore filling					1	3	3	1	6	0.666667	1	0.333333	4.33333	6	7.33333	4.66667	1	3.66667	2.33333	1.33333	1.33333	1.33333	2.66667	0	1.66667	1.66667	0.666667	0	5	4	1.33333	0.333333	0.666667
		Fracture-filling					0	0	0	0	0	0	0	0	0	0	0	0	0	0	0	0	0	0	0	0	0	0	0	0	0	0	0	0	0
	Halite						39.6667	11	7.66667	6.33333	0	0	0	0	0	0	0	0	0	0	0	0	0	0	0	0	0	0	0	0	0	0	0	0	0
		Replacive					0	0	0	0	0	0	0	0	0	0	0	0	0	0	0	0	0	0	0	0	0	0	0	0	0	0	0	0	0
		Pore filling					36.3333	10	7	6	0	0	0	0	0	0	0	0	0	0	0	0	0	0	0	0	0	0	0	0	0	0	0	0	0
		Fracture-filling					3.33333	1	0.666667	0.333333	0	0	0	0	0	0	0	0	0	0	0	0	0	0	0	0	0	0	0	0	0	0	0	0	0
	Calcite						0	0	0	0	0	0	0	0	0	0	0	0.333333	0	0	83.3333	81.3333	61.3333	0	0	0	0	0	0	0	0	0	0	0	0
		Neomorphic/Replacive (D-dolomite)					0	0	0	0	0	0	0	0	0	0	0	0.333333	0	0	82.3333	81.3333	54	0	0	0	0	0	0	0	0	0	0	0	0
		Pore-filling					0	0	0	0	0	0	0	0	0	0	0	0	0	0	1	0	7.33333	0	0	0	0	0	0	0	0	0	0	0	0
		Fracture-filling					0	0	0	0	0	0	0	0	0	0	0	0	0	0	0	0	0	0	0	0	0	0	0	0	0	0	0	0	0
	Quartz						0	0	0	0	0	0	0	0	0	0	0	0	0	0	0	0	0	0	0	0	0	0	0	0	0	0	0	0	3
		Replacive					0	0	0	0	0	0	0	0	0	0	0	0	0	0	0	0	0	0	0	0	0	0	0	0	0	0	0	0	3
		Pore-filling					0	0	0	0	0	0	0	0	0	0	0	0	0	0	0	0	0	0	0	0	0	0	0	0	0	0	0	0	0
		Fracture-filling					0	0	0	0	0	0	0	0	0	0	0	0	0	0	0	0	0	0	0	0	0	0	0	0	0	0	0	0	0
	Pyrite						0	0	0	0	0	0	0	0	0	0	0	0	0	0	0	0	0	0	0	0	0	0	0	0	0	0	0	0	0
		Replacive					0	0	0	0	0	0	0	0	0	0	0	0	0	0	0	0	0	0	0	0	0	0	0	0	0	0	0	0	0
		Cement					0	0	0	0	0	0	0	0	0	0	0	0	0	0	0	0	0	0	0	0	0	0	0	0	0	0	0	0	0
	Residual hydrocarbon						0	1.66667	0	2	1.33333	6.66667	1.66667	0	1.33333	0	0	3	0.333333	0	0	0	5	1	0	0	0	0	0	1.33333	9	4	0.333333	6.66667	1
		Pore Filling					0	0	0	1.33333	0.666667	2.33333	0	0	0.333333	0	0	0.333333	0.333333	0	0	0	1.33333	1	0	0	0	0	0	0.333333	6	0.333333	0	3.66667	0
		Grain Rimming					0	1.66667	0	0.333333	0.666667	1.33333	1	0	0.666667	0	0	0.333333	0	0	0	0	3.33333	0	0	0	0	0	0	1	1.66667	1	0.333333	3	0.333333
		Fracture Filling					0	0	0	0	0	0	0	0	0	0	0	0	0	0	0	0	0.333333	0	0	0	0	0	0	0	1.33333	0	0	0	0
		Stylolite					0	0	0	0.333333	0	3	0.666667	0	0.333333	0	0	2.33333	0	0	0	0	0	0	0	0	0	0	0	0	0	2.66667	0	0	0.666667
	Total modal porosity						0	0	5.66667	1.66667	0.333333	5	1	4.66667	7.33333	7.33333	8.66667	7.33333	10	16	2.66667	3	10.6667	14.3333	11.6667	18.3333	13	12.3333	17.3333	11.6667	7	0.666667	0.333333	1	2.66667
		Primary macroporosity					0	0	0	0	0	0	0	0	0	0	0	0	0	0	0	0	0	0	0	0	0	0	0	0	0	0	0	0	0
			Primary interparticle				0	0	0	0	0	0	0	0	0	0	0	0	0	0	0	0	0	0	0	0	0	0	0	0	0	0	0	0	0
			Fenestral				0	0	0	0	0	0	0	0	0	0	0	0	0	0	0	0	0	0	0	0	0	0	0	0	0	0	0	0	0
			Primary intraparticle				0	0	0	0	0	0	0	0	0	0	0	0	0	0	0	0	0	0	0	0	0	0	0	0	0	0	0	0	0
		Secondary macroporosity					0	0	5.66667	1.66667	0.333333	5	1	4.66667	7.33333	7.33333	8.66667	7.33333	10	16	2.66667	3	10.6667	14.3333	11.6667	18.3333	13	12.3333	17.3333	11.6667	7	0.666667	0.333333	1	2.66667
			Intercrystalline				0	0	0	1	0	3.33333	0	2.33333	1.66667	6.33333	2.66667	2	2.33333	6.66667	0.333333	1.33333	0	3.33333	1.33333	1	5.33333	2.33333	6.33333	2.33333	1	0	0	0.333333	2
			Mouldic				0	0	0	0	0	0	0	0	0	0	0	0.666667	0	0	0	0	0.333333	0	0	0	0	0	0	0	0	0	0	0	0
				Isolated			0	0	0	0	0	0	0	0	0	0	0	0.666667	0	0	0	0	0.333333	0	0	0	0	0	0	0	0	0	0	0	0
				Connected			0	0	0	0	0	0	0	0	0	0	0	0	0	0	0	0	0	0	0	0	0	0	0	0	0	0	0	0	0
			Vugs				0	0	5.33333	0.666667	0	1	0.333333	0.666667	4.66667	1	5.66667	4.66667	7.66667	9.33333	2.33333	1.66667	9	10.3333	9	12	7.66667	9.66667	11	9.33333	5.66667	0.333333	0	0.666667	0
				Isolated			0	0	2.33333	0	0	1	0.333333	0.666667	1.33333	1	5.33333	4.33333	5	6.33333	2	1.33333	6.66667	5.66667	0.666667	1.66667	4.66667	3	6.33333	6	3.33333	0	0	0.666667	0
				Touching			0	0	3	0.666667	0	0	0	0	3.33333	0	0.333333	0.333333	2.66667	3	0.333333	0.333333	2.33333	4.66667	8.33333	10.3333	3	6.66667	4.66667	3.33333	2.33333	0.333333	0	0	0
			Secondary intraparticle				0	0	0	0	0	0	0	0	0	0	0	0	0	0	0	0	0	0	0	0	0	0	0	0	0	0	0	0	0
			Fractures (macroporosity)				0	0	0.333333	0	0.333333	0.666667	0.666667	1.66667	1	0	0.333333	0	0	0	0	0	0.333333	0	0.666667	0	0	0	0	0	0.333333	0.333333	0	0	0.333333
			Channel				0	0	0	0	0	0	0	0	0	0	0	0	0	0	0	0	1	0.666667	0.666667	5.33333	0	0.333333	0	0	0	0	0.333333	0	0.333333

## Sheet: E-9H2
X	X	X	X	X	X	I	E9-1	E9-2	E9-3	E9-4	E9-5	E9-6	E9-7	E9-8	E9-9	E9-10	E9-11	E9-12	E9-13	E9-14	E9-15	E9-16	E9-17	E9-18	E9-19	E9-20	E9-21	E9-22	E9-23	E9-24	E9-25	E9-26	E9-27	E9-28	E9-29	E9-30	E9-31	E9-32	E9-33	E9-34	E9-35	E9-36	E9-37	E9-38	E9-39	E9-40	E9-41	E9-42	E9-43
	Sequence						4	4	4	4	4	4	4	4	4	4	4	4	4	4	4	4	4	4	4	4	4	4	4	4	4	4	4	4	4	4	4	3	3	3	3	3	3	3	3	3	3	2	2
	depth (m dd DFE)						4720.7	4721.45	4722.71	4723.3	4724.04	4725.53	4727.43	4729.25	4730.15	4731.84	4733.43	4734.1	4735.7	4737.52	4739.66	4741.64	4743.18	4744.39	4745.8	4746.14	4747.43	4747.52	4750.38	4751.3	4752.63	4754.36	4755.93	4757.36	4757.62	4759.09	4760.22	4761.93	4763.96	4768.75	4769.72	4771.14	4772.48	4773.66	4775.44	4777.65	4778.78	4781.08	4781.42
	Allochems (cryptocrystalline calcite)						0	0	0	0	0	0	0	0	0	0	0	0	0	0	0	0	0	0	0	0	0	0	0	0	0	0	0	0	0	0	0	0	0	0	0	0	0	0	0	0	0	0	0
		Skeletal allochems (calcite)					0	0	0	0	0	0	0	0	0	0	0	0	0	0	0	0	0	0	0	0	0	0	0	0	0	0	0	0	0	0	0	0	0	0	0	0	0	0	0	0	0	0	0
		Non-skeletal allochems (calcite)					0	0	0	0	0	0	0	0	0	0	0	0	0	0	0	0	0	0	0	0	0	0	0	0	0	0	0	0	0	0	0	0	0	0	0	0	0	0	0	0	0	0	0
	Matrix (cryptocrystalline calcite)						0	0	0	0	0	0	0	0	0	0	0	0	0	0	0	0	0	0	0	0	0	0	0	0	0	0	0	0	0	0	0	0	0	0	0	0	0	0	0	0	0	0	0
		Micrite (calcite)					0	0	0	0	0	0	0	0	0	0	0	0	0	0	0	0	0	0	0	0	0	0	0	0	0	0	0	0	0	0	0	0	0	0	0	0	0	0	0	0	0	0	0
	Allochems (cryptocrystalline dolomite)						0	0	0	0	0	0	0	0	0	0	0	0	0	0	0	0	0	0	0	0	0	0	0	1.66667	0	0	0	0	0	0	0	0	0	0	0	0	0	0	0	0	0	0	0.333333
		Skeletal allochems (dolomite)					0	0	0	0	0	0	0	0	0	0	0	0	0	0	0	0	0	0	0	0	0	0	0	0	0	0	0	0	0	0	0	0	0	0	0	0	0	0	0	0	0	0	0
		Non-skeletal allochems (dolomite)					0	0	0	0	0	0	0	0	0	0	0	0	0	0	0	0	0	0	0	0	0	0	0	1.66667	0	0	0	0	0	0	0	0	0	0	0	0	0	0	0	0	0	0	0.333333
	Matrix (cryptocrystalline dolomite)						0	0	0	0	0	0	0	0	0	0	0	0	0	0	0	0	0	3.66667	0	0	0	3.33333	3	19.3333	1	0.333333	1.66667	2	0.666667	0.333333	2.66667	4	12.6667	10.3333	8.33333	4.66667	7.33333	2.33333	12	4	6	0	9
		Micrite					0	0	0	0	0	0	0	0	0	0	0	0	0	0	0	0	0	3.66667	0	0	0	3.33333	3	19.3333	1	0.333333	1.66667	2	0.666667	0.333333	2.66667	4	12.6667	10.3333	8.33333	4.66667	7.33333	2.33333	12	4	6	0	9
	Total replacive dolomite						78	68	66.6667	68.3363	63.8037	68	69.3333	63.3333	68.6667	62	72	67.6667	50.3333	57	50.3333	51	53.3333	64.3333	64.6667	50.6667	46.3333	61.6667	74.6667	70.6667	29.3333	72.6667	80.3333	78.3333	84	90.3333	46	69.3333	77	49	77	79	66.6667	61.3333	62	81.3333	82	36.3333	74
		Microcrystalline dolomite					0.333333	5.33333	1.66667	2.66678	3.65542	5	7	7.66667	11.3333	4.66667	2.33333	7.33333	4.33333	6.66667	0.666667	6.66667	16	25.3333	4.66667	4.66667	1.33333	2.66667	2.66667	25	3	13	42.3333	25	32	36.3333	3	0.333333	2.66667	1	2.66667	2.33333	2.33333	2	3.66667	0.666667	1.33333	0	9
		Planar dolomite					35	13.3333	5.33333	13.3339	14.2894	11.3333	12	9.33333	11	12.6667	16	11.6667	6.33333	4	6.66667	8	7	6.33333	15.6667	15.3333	13	19	19.3333	4.66667	2.33333	12.3333	1.33333	3	6.66667	3	11	21	12	11.3333	16.6667	15.3333	13.6667	11.3333	15	7	12	14	2.66667
			Planar-s				32	12	5.33333	9.33374	11.6309	6	4.66667	2.66667	4.66667	10	8.66667	6.66667	5.66667	2	5.66667	5	6.33333	1	13.3333	8.66667	7.33333	8.66667	15.6667	1	0	10.3333	1.33333	0	4	1	9.66667	17	9.33333	9	12	11.3333	11.6667	7.33333	9.33333	5	8	11.3333	2.66667
			Planar-e				3	1.33333	0	4.00018	2.65849	5.33333	7.33333	6.66667	6.33333	2.66667	7.33333	5	0.666667	2	1	3	0.666667	5.33333	2	4.66667	2.66667	10.3333	3.66667	2.66667	2.33333	2	0	3	2.66667	2	1.33333	4	2.33333	2.33333	4.66667	3.66667	2	4	5.33333	2	4	1.33333	0
			Planar-p				0	0	0	0	0	0	0	0	0	0	0	0	0	0	0	0	0	0	0.333333	2	3	0	0	1	0	0	0	0	0	0	0	0	0.333333	0	0	0.333333	0	0	0.333333	0	0	1.33333	0
		Non-planar dolomite					42.6667	49.3333	59.6667	52.3356	45.8589	51.6667	50.3333	46.3333	46.3333	44.6667	53.6667	48.6667	39.6667	46.3333	43	36.3333	30.3333	32.6667	44.3333	30.6667	32	40	52.6667	41	24	47.3333	36.6667	50.3333	45.3333	51	32	48	62.3333	36.6667	57.6667	61.3333	50.6667	48	43.3333	73.6667	68.6667	22.3333	62.3333
			Non-planar-a				42.67	49.3333	59.6667	52.3356	45.8589	51.6667	50.3333	46.3333	46.3333	44.6667	53.6667	48.6667	39.6667	46.3333	43	36.3333	30	32.6667	44.3333	27	27.3333	40	52.3333	30.6667	20.6667	47.3333	36.6667	50.3333	45.3333	51	32	48	62.3333	36.6667	57.6667	61.3333	49.6667	48	42	73.3333	68.6667	21.6667	62
			Non-planar-p				0	0	0	0	0	0	0	0	0	0	0	0	0	0	0	0	0.333333	0	0	3.66667	4.66667	0	0.333333	10.6667	3.33333	0	0	0	0	0	0	0	0	0	0	0	1	0	1.33333	0.333333	0	0.666667	0.333333
			Saddle dolomite				0	0	0	0	0	0	0	0	0	0	0	0	0	0	0	0	0	0	0	0	0	0	0	0	0	0	0	0	0	0	0	0	0	0	0	0	0	0	0	0	0	0	0
	Dolomite cements						8.33333	9	10	14.0006	10.6339	6.66667	4.33333	3.66667	11.3333	5	7.33333	12	15.6667	5	3.66667	13	9	8.33333	6.33333	3.66667	12	5	2.33333	1.33333	0.666667	10.3333	0	0	0	0	8	9.66667	0	1.66667	2	3	3.33333	8	14	6.33333	4	1.66667	0.333333
		Pore-filling planar					5.66667	8	5	7.33365	5.64928	4	2.66667	3	5.33333	1.66667	2.33333	2.66667	4.66667	1.66667	2.66667	0.333333	0.666667	0	4.66667	3.66667	8.33333	3.66667	2	0	0	7.33333	0	0	0	0	4.33333	5.66667	0	1	2	2	1.66667	4	10.3333	4.66667	2.33333	1.66667	0
		Pore-filling non-planar					2.66667	1	5	6.66696	4.98466	2.66667	1.66667	0.666667	6	3.33333	5	9.33333	11	3.33333	1	0	0.666667	0	1.33333	0	3.66667	1	0	0.333333	0	3	0	0	0	0	3	4	0	0.666667	0	0.333333	0.666667	3.66667	3.66667	1.66667	1.66667	0	0
		Overgrowth					0	0	0	0	0	0	0	0	0	0	0	0	0	0	0	12.6667	7.66667	8.33333	0.333333	0	0	0.333333	0	1	0.666667	0	0	0	0	0	0.666667	0	0	0	0	0.666667	0	0	0	0	0	0	0.333333
		Fracture-filling					0	0	0	0	0	0	0	0	0	0	0	0	0	0	0	0	0	0	0	0	0	0	0.333333	0	0	0	0	0	0	0	0	0	0	0	0	0	1	0.333333	0	0	0	0	0
	Gypsum/Anhydrite						0	0.333333	0	1.32901	1.66155	0.666667	1.66667	1.66667	0.333333	0.333333	1	1.33333	1.33333	8.33333	41	25.3333	24.6667	4	11.6667	17.3333	8	15	2	2.66667	6.33333	10	15.6667	16	12.3333	6.66667	10	0.333333	3.33333	16.3333	5.66667	7.33333	18	21.3333	2	1.33333	1.66667	58.6667	1
		Replacive laths					0	0	0	0.995658	0.996933	0.333333	0	0	0	0	0.333333	0	0.333333	2.33333	4	3	6.66667	2.33333	3.33333	4	1	2	0.666667	0.333333	2	1.66667	5	2	3	3	5	0	0.666667	4	1.66667	2	1.66667	4	0.666667	1	0.666667	2	0
		Replacive/displacive nodules					0	0	0	0	0	0	0	0	0	0	0	0	0	1.33333	29	19.3333	12.3333	0	4	9	2	1.33333	0	0.666667	1.33333	0.666667	8.66667	13	5	2.33333	1.33333	0	0	9.66667	0.666667	3.66667	4.66667	13	0	0	0	50.3333	0
		Pore filling					0	0	0	0.333348	0.664622	0.333333	1.66667	1.66667	0.333333	0.333333	0.666667	1.33333	1	4.66667	7	1.33333	5.66667	1.66667	4.33333	3	5	11.3333	1.33333	1.66667	3	6	2	0.666667	2	1.33333	3.66667	0.333333	2.66667	2.66667	3	1	3.33333	2.66667	1.33333	0.333333	1	5.33333	1
		Fracture-filling					0	0	0	0	0	0	0	0	0	0	0	0	0	0	0	0	0	0	0	0	0	0	0.333333	0	0	0	0	0	0	0	0	0	0	0	0	0	1	0.333333	0	0	0	0	0
	Halite						12.3333	21.6667	20.6667	15.6674	22.2648	23	24.3333	31	19	32.6667	9	17	19.3333	22	1.33333	9	7.33333	16.6667	12	1	0.333333	0.333333	1.66667	0.333333	0.666667	0.333333	0	0	0.333333	0.666667	0.333333	2	0	0	2.33333	0.333333	0	0.333333	0.333333	0.333333	0.666667	2.66667	0
		Replacive					0	0	0	0	0	0	0	0	0	0	0	0	0	0	0	0	0	0	0	0	0	0	0	0	0	0	0	0	0	0	0	0	0	0	0	0	0	0	0	0	0	0	0
		Pore filling					10.6667	19.3333	20	6.33361	21.6002	21.6667	24.3333	28.3333	16.6667	28.6667	8	14	19	21.6667	1.33333	9	7	16.6667	12	1	0.333333	0.333333	1.33333	0.333333	0.666667	0.333333	0	0	0.333333	0.666667	0.333333	2	0	0	2.33333	0.333333	0	0.333333	0.333333	0.333333	0.666667	2.66667	0
		Fracture-filling					1.66667	2.33333	0.666667	9.33374	0.664622	1.33333	0	2.66667	2.33333	4	1	3	0.333333	0.333333	0	0	0.333333	0	0	0	0	0	0.333333	0	0	0	0	0	0	0	0	0	0	0	0	0	0	0	0	0	0	0	0
	Calcite						0	0	0	0	0	0	0	0	0	0	6.66667	0.333333	8	0	3.33333	0	0	0	0	15.6667	28.3333	1	11.3333	0.333333	52	0	0	0	0	0	0	0	0	0	0	0	0	0	0	0	0	0	0
		Neomorphic/Replacive (D-dolomite)					0	0	0	0	0	0	0	0	0	0	1	0	0.333333	0	0	0	0	0	0	7.33333	18.3333	0	6.66667	0	47	0	0	0	0	0	0	0	0	0	0	0	0	0	0	0	0	0	0
		Pore-filling					0	0	0	0	0	0	0	0	0	0	5.33333	0.333333	5.66667	0	3.33333	0	0	0	0	8.33333	9.66667	0.666667	2	0.333333	4.66667	0	0	0	0	0	0	0	0	0	0	0	0	0	0	0	0	0	0
		Fracture-filling					0	0	0	0	0	0	0	0	0	0	0.333333	0	2	0	0	0	0	0	0	0	0.333333	0.333333	2.66667	0	0.333333	0	0	0	0	0	0	0	0	0	0	0	0	0	0	0	0	0	0
	Quartz						0.666667	0	1.66667	0.333348	0	0.666667	0	0	0	0	0	0	0.666667	0	0	0.666667	0	0.333333	0	0	0	0	0	0	0	0	0.333333	0	0	0.333333	16.3333	0	0	0	0	0	0	0	0	0	0	0	0
		Replacive					0.666667	0	1.66667	0.333348	0	0	0	0	0	0	0	0	0	0	0	0.666667	0	0.333333	0	0	0	0	0	0	0	0	0.333333	0	0	0.333333	10.3333	0	0	0	0	0	0	0	0	0	0	0	0
		Pore-filling					0	0	0	0	0	0.666667	0	0	0	0	0	0	0.333333	0	0	0	0	0	0	0	0	0	0	0	0	0	0	0	0	0	6	0	0	0	0	0	0	0	0	0	0	0	0
		Fracture-filling					0	0	0	0	0	0	0	0	0	0	0	0	0.333333	0	0	0	0	0	0	0	0	0	0	0	0	0	0	0	0	0	0	0	0	0	0	0	0	0	0	0	0	0	0
	Pyrite						0	0	0	0	0	0	0	0	0	0	0	0	0	0	0	0	0	0	0	0	0	0	0	0	0	0	0	0	0	0	0	0	0	0	0	0	0	0	0	0	0	0	0
		Replacive					0	0	0	0	0	0	0	0	0	0	0	0	0	0	0	0	0	0	0	0	0	0	0	0	0	0	0	0	0	0	0	0	0	0	0	0	0	0	0	0	0	0	0
		Cement					0	0	0	0	0	0	0	0	0	0	0	0	0	0	0	0	0	0	0	0	0	0	0	0	0	0	0	0	0	0	0	0	0	0	0	0	0	0	0	0	0	0	0
	Residual hydrocarbon						0.666667	1	1	0.333348	1.63599	0.666667	0.333333	0.333333	0.666667	0	3.66667	1.66667	4.66667	7.66667	0.333333	1	5.66667	2.66667	5.33333	10.3333	5	13	4.33333	3.66667	10	4.33333	2	1	1.33333	1.66667	8	3	6.33333	0.333333	3.33333	2.33333	3	0.666667	5.66667	3.66667	2	0	13.3333
		Pore Filling					0.666667	0.666667	0.333333	0	0.984151	0.333333	0.333333	0.333333	0.333333	0	1.66667	0	2	5	0.333333	0.333333	1.66667	0.333333	4	3.66667	2	5	0.666667	1.66667	1.33333	1.33333	1	0.333333	0.666667	1.66667	2.66667	1	4	0	1	1	2	0	1.33333	3	0	0	5.66667
		Grain Rimming					0	0.333333	0	0.333348	0.332311	0	0	0	0.333333	0	1.33333	1.66667	2.66667	2	0	0.666667	4	2.33333	1.33333	4.33333	2.66667	3	1.33333	2	3	1	1	0.666667	0.333333	0	3.66667	2	2.33333	0.333333	0.333333	1.33333	1	0.666667	4.33333	0.333333	2	0	4.33333
		Fracture Filling					0	0	0.333333	0	0	0	0	0	0	0	0.333333	0	0	0.666667	0	0	0	0	0	0	0	0	2	0	0.666667	0	0	0	0	0	0.666667	0	0	0	0	0	0	0	0	0	0	0	1
		Stylolite					0	0	0.333333	0	0.31953	0.333333	0	0	0	0	0.333333	0	0	0	0	0	0	0	0	2.33333	0.333333	5	0.333333	0	5	2	0	0	0.333333	0	1	0	0	0	2	0	0	0	0	0.333333	0	0	2.33333
	Total modal porosity						0	0	0	0	0	0.333333	0	0	0	0	0.333333	0	0	0	0	0	0	0	0	1.33333	0	0.666667	0.666667	0	0	2	0	2.66667	1.33333	0	8.66667	11.6667	0.666667	22.3333	1.33333	3.33333	1.66667	6	4	3	3.66667	0.666667	2
		Primary macroporosity					0	0	0	0	0	0	0	0	0	0	0	0	0	0	0	0	0	0	0	0	0	0	0	0	0	0.333333	0	0.333333	0	0	0.333333	0	0	0	0	0	0.333333	0	0	0	0	0	0
			Primary interparticle				0	0	0	0	0	0	0	0	0	0	0	0	0	0	0	0	0	0	0	0	0	0	0	0	0	0	0	0	0	0	0	0	0	0	0	0	0	0	0	0	0	0	0
			Fenestral				0	0	0	0	0	0	0	0	0	0	0	0	0	0	0	0	0	0	0	0	0	0	0	0	0	0	0	0	0	0	0	0	0	0	0	0	0	0	0	0	0	0	0
			Primary intraparticle				0	0	0	0	0	0	0	0	0	0	0	0	0	0	0	0	0	0	0	0	0	0	0	0	0	0.333333	0	0.333333	0	0	0.333333	0	0	0	0	0	0.333333	0	0	0	0	0	0
		Secondary macroporosity					0	0	0	0	0	0.333333	0	0	0	0	0.333333	0	0	0	0	0	0	0	0	1.33333	0	0.666667	0.666667	0	0	1.66667	0	2.33333	1.33333	0	8.33333	11.6667	0.666667	22.3333	1.33333	3.33333	1.33333	6	4	3	3.66667	0.666667	2
			Intercrystalline				0	0	0	0	0	0	0	0	0	0	0	0	0	0	0	0	0	0	0	0	0	0.666667	0	0	0	0.666667	0	0	0	0	0	1.33333	0	7	0.333333	1	0	1.33333	0.666667	1	1	0.333333	0
			Mouldic				0	0	0	0	0	0	0	0	0	0	0	0	0	0	0	0	0	0	0	0	0	0	0	0	0	0	0	0	0	0	1	0	0.333333	0.666667	0	0	0	0	0	0	0	0	0.666667
				Isolated			0	0	0	0	0	0	0	0	0	0	0	0	0	0	0	0	0	0	0	0	0	0	0	0	0	0	0	0	0	0	1	0	0.333333	0.666667	0	0	0	0	0	0	0	0	0.666667
				Connected			0	0	0	0	0	0	0	0	0	0	0	0	0	0	0	0	0	0	0	0	0	0	0	0	0	0	0	0	0	0	0	0	0	0	0	0	0	0	0	0	0	0	0
			Vugs				0	0	0	0	0	0.333333	0	0	0	0	0.333333	0	0	0	0	0	0	0	0	0	0	0	0.333333	0	0	1	0	2.33333	1	0	4.33333	8.66667	0.333333	14.6667	1	2.33333	1.33333	4.66667	3	2	2.66667	0.333333	1.33333
				Isolated			0	0	0	0	0	0.333333	0	0	0	0	0.333333	0	0	0	0	0	0	0	0	0	0	0	0.333333	0	0	1	0	0.666667	0.333333	0	3.66667	3.66667	0.333333	7	0.666667	2.33333	1.33333	2.66667	3	1.66667	1.66667	0.333333	1.33333
				Touching			0	0	0	0	0	0	0	0	0	0	0	0	0	0	0	0	0	0	0	0	0	0	0	0	0	0	0	1.66667	0.666667	0	1.33333	5	0	7.66667	0.333333	0	0	2	0	0.333333	1	0	0
			Secondary intraparticle				0	0	0	0	0	0	0	0	0	0	0	0	0	0	0	0	0	0	0	0	0	0	0	0	0	0	0	0	0	0	0	0	0	0	0	0	0	0	0	0	0	0	0
			Fractures (macroporosity)				0	0	0	0	0	0	0	0	0	0	0	0	0	0	0	0	0	0	0	1.33333	0	0	0.333333	0	0	0	0	0	0.333333	0	3	1	0	0	0	0	0	0	0	0	0	0	0
			Channel				0	0	0	0	0	0	0	0	0	0	0	0	0	0	0	0	0	0	0	0	0	0	0	0	0	0	0	0	0	0	0	0.666667	0	0	0	0	0	0	0.333333	0	0	0	0
[truncated: 3 more columns]

## Sheet: E-11H3
X	X	X	X	X	X	I	E11-1	E11-2	E11-3	E11-4	E11-5	E11-6	E11-7	E11-8	E11-9	E11-10	E11-11A	E11-11B	E11-12	E11-13	E11-14
	Sequence						Floater	Floater	4	4	4	4	3	3	3	3	3	3	3	3	2
	depth (m dd DFE)						4630.22	4632.56	4657.7	4658.88	4661.06	4662.02	4664.09	4666.4	4667.42	4669.07	4669.58	4669.58	4671.73	4673.88	4675.01
	Allochems (cryptocrystalline calcite)						0	0	0	0	0	0	0	0	0	0	0	0	0	0	0
		Skeletal allochems (calcite)					0	0	0	0	0	0	0	0	0	0	0	0	0	0	0
		Non-skeletal allochems (calcite)					0	0	0	0	0	0	0	0	0	0	0	0	0	0	0
	Matrix (cryptocrystalline calcite)						0	0	0	0	0	0	0	0	0	0	0	0	0	0	0
		Micrite (calcite)					0	0	0	0	0	0	0	0	0	0	0	0	0	0	0
	Allochems (cryptocrystalline dolomite)						0	0	0	0	0	0	0	0	0	0	0	1	0	0	3
		Skeletal allochems (dolomite)					0	0	0	0	0	0	0	0	0	0	0	0	0	0	0
		Non-skeletal allochems (dolomite)					0	0	0	0	0	0	0	0	0	0	0	1	0	0	3
	Matrix (cryptocrystalline dolomite)						19	1.66667	5	0.333333	0	0	9.66667	5	0.666667	3	0	7.66667	0.333333	2	3.66667
		Micrite					19	1.66667	5	0.333333	0	0	9.66667	5	0.666667	3	0	7.66667	0.333333	2	3.66667
	Total replacive dolomite						73	25.6667	57.3333	62.3333	58	54.3333	69	79.6667	61	31.3333	44.6667	53	60	72.6667	43.3333
		Microcrystalline dolomite					63	19.3333	4.33333	2.33333	3	0.666667	5.33333	10.6667	1.33333	4.33333	3.33333	6.66667	1.66667	0.666667	1
		Planar dolomite					1.66667	1.66667	10.3333	6.33333	7	16.6667	16.6667	6.33333	6.33333	2.66667	6	7	19	17.6667	7.33333
			Planar-s				1.66667	1	4.66667	4.33333	4.66667	10.3333	14.6667	3.66667	4.66667	1.66667	5.33333	7	16	15	6
			Planar-e				0	0	5.66667	2	2.33333	6.33333	2	2.66667	1.66667	1	0.666667	0	3	2.66667	1.33333
			Planar-p				0	0.666667	0	0	0	0	0	0	0	0	0	0	0	0	0
		Non-planar dolomite					8.33333	4.66667	42.6667	53.6667	48	37	47	62.6667	53.3333	24.3333	35.3333	39.3333	39.3333	54.3333	35
			Non-planar-a				8.33333	2.33333	42.6667	53.6667	48	37	47	62.6667	51.3333	22.6667	35.3333	38	39.3333	54.3333	35
			Non-planar-p				0	2.33333	0	0	0	0	0	0	2	1.66667	0	1.33333	0	0	0
			Saddle dolomite				0	0	0	0	0	0	0	0	0	0	0	0	0	0	0
	Dolomite cements						0	0.333333	16	12.3333	10.3333	14.6667	4.33333	0.666667	3	0.666667	0	1	7.33333	15.3333	5.33333
		Pore-filling planar					0	0.333333	11.3333	8.66667	8	12	1.33333	0	2.66667	0.333333	0	0.333333	6.33333	12.3333	3.66667
		Pore-filling non-planar					0	0	4.66667	3.66667	2.33333	2.66667	0.333333	0.333333	0	0	0	0	0.666667	3	1.33333
		Overgrowth					0	0	0	0	0	0	2.33333	0.333333	0.333333	0.333333	0	0.666667	0.333333	0	0.333333
		Fracture-filling					0	0	0	0	0	0	0.333333	0	0	0	0	0	0	0	0
	Gypsum/Anhydrite						3.66667	9	6.66667	2.33333	20	20.6667	14	10.3333	31.3333	62.6667	48	32.6667	15	1.66667	35.6667
		Replacive laths					1	0.666667	1.66667	0.333333	3	5	3	3.66667	4.66667	4.33333	5.33333	8.33333	2.66667	0.666667	1.33333
		Replacive/displacive nodules					1	0	0	0	11.3333	9	4.33333	5	18.6667	51.3333	37.6667	22.6667	5	0	5.66667
		Pore filling					1.66667	8.33333	5	2	2	6	5.66667	1.33333	1.33333	2	1.66667	1.66667	5	1	2.33333
		Fracture-filling					0	0	0	0	0	0	0.333333	0	0	0	0	0	0	0	0
	Halite						0.333333	63.3333	0	0	0.333333	0	0	0	0	0	0	0	0	0	0.333333
		Replacive					0	0	0	0	0	0	0	0	0	0	0	0	0	0	0
		Pore filling					0.333333	61.3333	0	0	0.333333	0	0	0	0	0	0	0	0	0	0.333333
		Fracture-filling					0	2	0	0	0	0	0	0	0	0	0	0	0	0	0
	Calcite						0	0	0	0	0	0	0	0	0	0	0	0	0	0	0
		Neomorphic/Replacive (D-dolomite)					0	0	0	0	0	0	0	0	0	0	0	0	0	0	0
		Pore-filling					0	0	0	0	0	0	0	0	0	0	0	0	0	0	0
		Fracture-filling					0	0	0	0	0	0	0	0	0	0	0	0	0	0	0
	Quartz						0	0	0.333333	0	0	0.333333	0	0	0	0	0	0	0	0	0
		Replacive					0	0	0.333333	0	0	0.333333	0	0	0	0	0	0	0	0	0
		Pore-filling					0	0	0	0	0	0	0	0	0	0	0	0	0	0	0
		Fracture-filling					0	0	0	0	0	0	0	0	0	0	0	0	0	0	0
	Pyrite						0	0	0	0	0	0	0	0	0	0	0	0	0	0	0
		Replacive					0	0	0	0	0	0	0	0	0	0	0	0	0	0	0
		Cement					0	0	0	0	0	0	0	0	0	0	0	0	0	0	0
	Residual hydrocarbon						4	0	1	10	0	0	1.33333	0.333333	0	2	0	3.33333	0	0	0.333333
		Pore Filling					3.33333	0	1	7	0	0	1	0.333333	0	2	0	2.33333	0	0	0.333333
		Grain Rimming					0.666667	0	0	3	0	0	0.333333	0	0	0	0	1	0	0	0
		Fracture Filling					0	0	0	0	0	0	0	0	0	0	0	0	0	0	0
		Stylolite					0	0	0	0	0	0	0	0	0	0	0	0	0	0	0
	Total modal porosity						0	0	13.6667	12.6667	11.3333	10	1.66667	4	4	0.333333	7.33333	1.33333	17.3333	8.33333	8.33333
		Primary macroporosity					0	0	0	0	0	0	0	0	0	0	0	0	0	0	0
			Primary interparticle				0	0	0	0	0	0	0	0	0	0	0	0	0	0	0
			Fenestral				0	0	0	0	0	0	0	0	0	0	0	0	0	0	0
			Primary intraparticle				0	0	0	0	0	0	0	0	0	0	0	0	0	0	0
		Secondary macroporosity					0	0	13.6667	12.6667	11.3333	10	1.66667	4	4	0.333333	7.33333	1.33333	17.3333	8.33333	8.33333
			Intercrystalline				0	0	8	1.33333	3.66667	4.66667	1	2	1.66667	0	3	0.333333	12.6667	1.33333	0
			Mouldic				0	0	0	0	0	0	0	0	0.333333	0	0	0	0	0	0
				Isolated			0	0	0	0	0	0	0	0	0.333333	0	0	0	0	0	0
				Connected			0	0	0	0	0	0	0	0	0	0	0	0	0	0	0
			Vugs				0	0	5.66667	9.66667	7.33333	5.33333	0.666667	2	1.66667	0	2	0.333333	4.66667	5.66667	2.66667
				Isolated			0	0	4	4	4.33333	3	0.666667	2	1.66667	0	1.66667	0.333333	4.33333	3	1
				Touching			0	0	1.66667	5.66667	3	2.33333	0	0	0	0	0.333333	0	0.333333	2.66667	1.66667
			Secondary intraparticle				0	0	0	0	0	0	0	0	0	0.333333	0	0	0	0	4.66667
			Fractures (macroporosity)				0	0	0	0.326797	0.333333	0	0	0	0	0	2.33333	0.666667	0	0	1
			Channel				0	0	0	1.33333	0	0	0	0	0.333333	0	0	0	0	1.33333	0

## Sheet: F-1H1
X	X	X	X	X	X	I	F1-1	F1-2	F1-3	F1-4	F1-5	F1-6	F1-7	F1-8	F1-9	F1-10	F1-11	F1-12	F1-13	F1-14	F1-15	F1-16	F1-17	F1-18	F1-19	F1-20	F1-21	F1-22	F1-23	F1-24	F1-25	F1-26	F1-27	F1-28	F1-29
	Sequence						4	4	4	4	4	4	4	3	3	2	2	2	2	2	2	2	2	2	2	2	2	2	2	2	2	2	2	2	2
	depth (m dd DFE)						5031.29	5032.69	5034.61	5036.39	5038.25	5040.56	5041.28	5043.85	5045.66	5046.49	5048.68	5050.63	5052.3	5055.94	5058.18	5060.1	5060.95	5063.06	5063.98	5064.62	5066.64	5068.32	5069.37	5072.25	5073.02	5075.05	5077.04	5078.9	5081.77
	Allochems (cryptocrystalline calcite)						0	0	0	0	0	0	0	0	0	0	0	0	0	0	0	0	0	0	0	0	0	0	0	0	0	0	0	0	0
		Skeletal allochems (calcite)					0	0	0	0	0	0	0	0	0	0	0	0	0	0	0	0	0	0	0	0	0	0	0	0	0	0	0	0	0
		Non-skeletal allochems (calcite)					0	0	0	0	0	0	0	0	0	0	0	0	0	0	0	0	0	0	0	0	0	0	0	0	0	0	0	0	0
	Matrix (cryptocrystalline calcite)						0	0	0	0	0	0	0	0	0	0	0	0	0	0	0	0	0	0	0	0	0	0	0	0	0	0	0	0	0
		Micrite (calcite)					0	0	0	0	0	0	0	0	0	0	0	0	0	0	0	0	0	0	0	0	0	0	0	0	0	0	0	0	0
	Allochems (cryptocrystalline dolomite)						0.333333	0	0.333333	0.333333	0	0	0	0	1.33333	0	0	2	0	0	0	0	0	0	0	0	0	0.666667	0	0	0	0	0	0	0
		Skeletal allochems (dolomite)					0	0	0	0	0	0	0	0	0	0	0	0	0	0	0	0	0	0	0	0	0	0	0	0	0	0	0	0	0
		Non-skeletal allochems (dolomite)					0.333333	0	0.333333	0.333333	0	0	0	0	1.33333	0	0	2	0	0	0	0	0	0	0	0	0	0.666667	0	0	0	0	0	0	0
	Matrix (cryptocrystalline dolomite)						0.333333	1	0	3.66667	3	0	0.333333	0	3	1.33333	0.333333	5.66667	3	2	1	1.33333	0	0	0	0.333333	6	6	0.333333	0.333333	1	1	0	0.666667	2
		Micrite					0.333333	1	0	3.66667	3	0	0.333333	0	3	1.33333	0.333333	5.66667	3	2	1	1.33333	0	0	0	0.333333	6	6	0.333333	0.333333	1	1	0	0.666667	2
	Total replacive dolomite						76	58	66.6667	30.6667	48.6667	80	51	67.3333	29	53.3333	65.3333	46.3333	61	67.3333	49.3333	55	52.6667	71	67.6667	59.6667	62	58.3333	79.6667	63.6667	68.3333	64.6667	57	49.6667	45.3333
		Microcrystalline dolomite					15.3333	2.66667	4	16.6667	13	13.6667	6	3	13.3333	22.6667	8.66667	4	3.33333	1	1	3.33333	3	12	10.6667	8.33333	20	13.3333	8.66667	1.33333	9.66667	15.3333	10	6.33333	3
		Planar dolomite					6.33333	6	11.6667	1.33333	8	10	22	25.6667	4.33333	8	13.3333	5	8.66667	7	10.6667	5.66667	3.66667	3.66667	4	5.33333	2.66667	7.66667	12.6667	13.3333	16	10.6667	8.66667	16	14.6667
			Planar-s				6	5.66667	11.3333	1.33333	6.33333	10	18.3333	25.3333	4.33333	8	13.3333	5	8.66667	7	10.6667	5.66667	3.66667	3.33333	4	5.33333	2.66667	7.66667	12.3333	12	11.6667	8	6.66667	13.6667	14
			Planar-e				0.333333	0.333333	0.333333	0	1.66667	0	3.66667	0.333333	0	0	0	0	0	0	0	0	0	0.333333	0	0	0	0	0.333333	1.33333	4.33333	2.66667	0	0.666667	0.333333
			Planar-p				0	0	0	0	0	0	0	0	0	0	0	0	0	0	0	0	0	0	0	0	0	0	0	0	0	0	2	1.66667	0.333333
		Non-planar dolomite					54.3333	49.3333	51	12.6667	27.6667	56.3333	23	38.6667	11.3333	22.6667	43.3333	37.3333	49	59.3333	37.6667	46	46	55.3333	53	46	39.3333	37.3333	58.3333	49	42.6667	38.6667	38.3333	27.3333	27.6667
			Non-planar-a				54.3333	49.3333	51	12.6667	27.6667	56.3333	23	38.6667	7.66667	22.6667	43.3333	37.3333	49	59.3333	35.6667	44	44.6667	55.3333	52.6667	45.3333	39.3333	37.3333	58.3333	49	42.6667	38.6667	33.3333	26	26.6667
			Non-planar-p				0	0	0	0	0	0	0	0	3.66667	0	0	0	0	0	2	2	1.33333	0	0.333333	0.666667	0	0	0	0	0	0	5	1.33333	1
			Saddle dolomite				0	0	0	0	0	0	0	0	0	0	0	0	0	0	0	0	0	0	0	0	0	0	0	0	0	0	0	0	0
	Dolomite cements						7.33333	11	7.33333	0.333333	19	2	19.6667	2	0	1	7	18	4.66667	7.66667	5.33333	0.333333	3	0.666667	2.33333	11.6667	5	5.66667	1.33333	10	16.6667	19	6.66667	8.33333	14
		Pore-filling planar					6.33333	6.33333	6	0.333333	12.6667	1	10	1	0	0.333333	2.66667	6.66667	2.33333	4.33333	2.66667	0	1	0.666667	1	4.33333	1.66667	2	1	5.66667	9.66667	12.6667	3	6.66667	5.66667
		Pore-filling non-planar					1	3	1	0	6.33333	0.666667	9.66667	0	0	0.666667	3.66667	7.66667	2.33333	3	2.33333	0.333333	2	0	1.33333	7.33333	2.33333	0	0.333333	4.33333	7	6.33333	3.33333	1.66667	8.33333
		Overgrowth					0	0	0.333333	0	0	0.333333	0	0	0	0	0.666667	3.66667	0	0.333333	0	0	0	0	0	0	0.333333	3.66667	0	0	0	0	0.333333	0	0
		Fracture-filling					0	1.66667	0	0	0	0	0	1	0	0	0	0	0	0	0.333333	0	0	0	0	0	0.666667	0	0	0	0	0	0	0	0
	Gypsum/Anhydrite						6.66667	6.33333	16	28.6667	4.33333	12.6667	2.66667	17.3333	62.3333	41.3333	20.6667	11.6667	22.3333	17.6667	36	30	37.6667	20.6667	26	12.6667	13.3333	18.3333	6	21.3333	4	4.33333	27	6	24.6667
		Replacive laths					1.33333	2.66667	2.66667	8.66667	0	2.66667	0.666667	0.666667	1	5	3.66667	2	3.66667	1.33333	3.66667	4	8	1.33333	8.66667	7.66667	8.33333	6.33333	1.33333	3.66667	1.33333	0.666667	3.33333	1.66667	3
		Replacive/displacive nodules					0	0	0.333333	6.66667	0	1.66667	0	2.66667	57	30.6667	8.66667	0.333333	7	2.33333	21	22.3333	24.6667	9.33333	7	0	0	5.66667	0.666667	3.33333	0	0	14.3333	0.333333	19.6667
		Pore filling					4.33333	3.33333	9.66667	9	4.33333	8	2	3.33333	4.33333	5.33333	6.33333	9	5	8	5	2	5	0	10	5	3.33333	6	4	4	1.33333	3.66667	7.33333	3.66667	2
		Fracture-filling					0	1.66667	0	0	0	0	0	1	0	0	0	0	0	0	0.333333	0	0	0	0	0	0.666667	0	0	0	0	0	0	0	0
	Halite						5	0	0.333333	0	0	0	0	0	0	0	0	0	0	0	0	0	0	0	0	0	0	0	0	0.333333	0	0	0	0	0
		Replacive					0	0	0	0	0	0	0	0	0	0	0	0	0	0	0	0	0	0	0	0	0	0	0	0	0	0	0	0	0
		Pore filling					3.66667	0	0	0	0	0	0	0	0	0	0	0	0	0	0	0	0	0	0	0	0	0	0	0.333333	0	0	0	0	0
		Fracture-filling					1.33333	0	0.333333	0	0	0	0	0	0	0	0	0	0	0	0	0	0	0	0	0	0	0	0	0	0	0	0	0	0
	Calcite						0	0	0	0	0	0	0	0	0	0	0	0	0	0	0	0	0	0	0	0	0	0	0	0	0	0	0	0	0
		Neomorphic/Replacive (D-dolomite)					0	0	0	0	0	0	0	0	0	0	0	0	0	0	0	0	0	0	0	0	0	0	0	0	0	0	0	0	0
		Pore-filling					0	0	0	0	0	0	0	0	0	0	0	0	0	0	0	0	0	0	0	0	0	0	0	0	0	0	0	0	0
		Fracture-filling					0	0	0	0	0	0	0	0	0	0	0	0	0	0	0	0	0	0	0	0	0	0	0	0	0	0	0	0	0
	Quartz						0	6.66667	1.33333	30.6667	1.33333	0	0	0	0	0	0	0	0	0	0	0	0	0	0	0	0	0	0	0	0	0	0	21.3333	0
		Replacive					0	5.66667	1	14.6667	0.666667	0	0	0	0	0	0	0	0	0	0	0	0	0	0	0	0	0	0	0	0	0	0	15.6667	0
		Pore-filling					0	1	0.333333	15	0.666667	0	0	0	0	0	0	0	0	0	0	0	0	0	0	0	0	0	0	0	0	0	0	5.33333	0
		Fracture-filling					0	0	0	1	0	0	0	0	0	0	0	0	0	0	0	0	0	0	0	0	0	0	0	0	0	0	0	0.333333	0
	Pyrite						0	0	0	0	0	0	0	0	0	0	0	0	0	0	0	0	0	0	0	0	0	0	0	0	0	0	0	0	0
		Replacive					0	0	0	0	0	0	0	0	0	0	0	0	0	0	0	0	0	0	0	0	0	0	0	0	0	0	0	0	0
		Cement					0	0	0	0	0	0	0	0	0	0	0	0	0	0	0	0	0	0	0	0	0	0	0	0	0	0	0	0	0
	Residual hydrocarbon						3.33333	1	1.33333	1.33333	2	1	1.33333	2.33333	4	1.33333	4	10.3333	3.66667	2.33333	7.33333	3.66667	5	5.33333	3.33333	14	12	9.33333	11	3.66667	7	1.66667	1.66667	2.33333	0
		Pore Filling					2	0	0.666667	1	0.666667	0	0.666667	2	1.33333	0.666667	2	5.66667	1	1	4.66667	2	3.66667	3.66667	1	12	7.66667	7.66667	8.66667	2	3.66667	1.33333	0	0	0
		Grain Rimming					1	0.666667	0.666667	0.333333	1.33333	0.333333	0.666667	0	1.33333	0.666667	1	4.33333	2.33333	1.33333	2.66667	1.66667	1.33333	0.666667	2	2	3.33333	1.66667	2	1.33333	0	0.333333	1	2	0
		Fracture Filling					0.333333	0	0	0	0	0.333333	0	0.333333	0	0	0	0.333333	0.333333	0	0	0	0	0.666667	0	0	0.333333	0	0	0.333333	0.333333	0	0	0	0
		Stylolite					0	0.333333	0	0	0	0.333333	0	0	1.33333	0	1	0	0	0	0	0	0	0.333333	0.333333	0	0.666667	0	0.333333	0	3	0	0.666667	0.333333	0
	Total modal porosity						1	16	6.66667	4.33333	21.6667	4.33333	25	11	0.333333	1.66667	2.66667	6	5.33333	3	1	9.66667	1.66667	2.33333	0.666667	1.66667	1.66667	1.66667	1.66667	0.666667	3	9.33333	7.66667	11.6667	14
		Primary macroporosity					0	0	0	0	0.333333	0	0	0	0	0	0	0	0	0	0	0	0	0	0	0	0	0	0	0	0	0	0	0	0
			Primary interparticle				0	0	0	0	0	0	0	0	0	0	0	0	0	0	0	0	0	0	0	0	0	0	0	0	0	0	0	0	0
			Fenestral				0	0	0	0	0.333333	0	0	0	0	0	0	0	0	0	0	0	0	0	0	0	0	0	0	0	0	0	0	0	0
			Primary intraparticle				0	0	0	0	0	0	0	0	0	0	0	0	0	0	0	0	0	0	0	0	0	0	0	0	0	0	0	0	0
		Secondary macroporosity					1	16	6.66667	4.33333	21.3333	4.33333	25	11	0.333333	1.66667	2.66667	6	5.33333	3	1	9.66667	1.66667	2.33333	0.666667	1.66667	1.66667	1.66667	1.66667	0.666667	3	9.33333	7.66667	11.6667	14
			Intercrystalline				0.333333	3	1	0	1	1.33333	5.66667	3.33333	0	0.333333	2	0.333333	0.666667	0.666667	0.666667	0	1	0.666667	0.333333	0.333333	0.333333	0.666667	0.333333	0	1.66667	3.66667	7	1.66667	4.66667
			Mouldic				0	0	0	0	0.333333	0	0	0	0	0	0	0.333333	0	0	0	0	0	0	0	0	0	0.333333	0	0	0	0	0	0	0
				Isolated			0	0	0	0	0.333333	0	0	0	0	0	0	0.333333	0	0	0	0	0	0	0	0	0	0.333333	0	0	0	0	0	0	0
				Connected			0	0	0	0	0	0	0	0	0	0	0	0	0	0	0	0	0	0	0	0	0	0	0	0	0	0	0	0	0
			Vugs				0.333333	11	5.66667	3.33333	20	3	19.3333	5.66667	0.333333	0	0.666667	5.33333	3.66667	2	0.333333	5.33333	0.333333	1	0	1.33333	0.333333	0.333333	0.666667	0.666667	0.666667	5.66667	0.666667	9.33333	8.66667
				Isolated			0.333333	6.66667	5.33333	2.33333	8.33333	1.33333	8	1.33333	0	0	0.666667	3	3.33333	2	0	4.33333	0.333333	0.333333	0	1.33333	0.333333	0.333333	0.666667	0.666667	0.666667	1.66667	0.666667	5.66667	4.33333
				Touching			0	4.33333	0.333333	1	11.6667	1.66667	11.3333	4.33333	0.333333	0	0	2.33333	0.333333	0	0.333333	1	0	0.666667	0	0	0	0	0	0	0	4	0	3.66667	4.33333
			Secondary intraparticle				0	0	0	0.666667	0	0	0	0	0	0	0	0	0	0	0	0	0	0	0	0	0	0	0	0	0	0	0	0	0
			Fractures (macroporosity)				0.333333	2	0	0.333333	0	0	0	2	0	1.33333	0	0	1	0.333333	0	4.33333	0.333333	0.666667	0	0	1	0	0.666667	0	0.333333	0	0	0	0
			Channel				0	0	0	0	0	0	0	0	0	0	0	0	0	0	0	0	0	0	0.333333	0	0	0.333333	0	0	0.333333	0	0	0.666667	0.666667

## Sheet: G-2H1
X	X	X	X	X	X	I	G2-1	G2-2	G2-3	G2-4	G2-5	G2-6	G2-7	G2-8	G2-9	G2-10	G2-11	G2-12	G2-13	G2-14	G2-15	G2-16	G2-17A	G2-17B	G2-18	G2-19A	G2-19B	G2-20	G2-21	G2-22	G2-23	G2-24	G2-25	G2-26	G2-27	G2-28	G2-29	G2-30	G2-31	G2-32	G2-33	G2-34	G2-35	G2-36	G2-37	G2-38	G2-39	G2-40	G2-41
	Sequence						Floater	Floater	Floater	Floater	Floater	Floater	Floater	Floater	Floater	5	5	5	5	5	5	5	5	5	5	5	5	4	4	4	4	4	4	4	4	3	3	3	3	3	2	2	2	2	2	2	2	2	2
	depth (m dd DFE)						4876.46	4878.51	4880.03	4884.33	4887.74	4888.14	4889.35	4892.22	4894.31	4915	4917.5	4918.43	4919.75	4920.67	4920.84	4924.49	4928.16	4928.16	4930.3	4933.85	4933.85	4936.4	4939.8	4940.86	4942.19	4945.89	4950.77	4954.07	4955.63	4958.69	4964.85	4967.4	4969.41	4971.08	4974.5	4977.55	4980.34	4983.33	4984.84	4986.74	4988.82	4991.01	4992.29
	Allochems (cryptocrystalline calcite)						0	0	0	0	0	0	0	0	0	0	0	0	0	0	0	0	0	0	0	0	0	0	0	0	0	0	0	0	0	0	0	0	0	0	0	0	0	0	0	0	0	0	0
		Skeletal allochems (calcite)					0	0	0	0	0	0	0	0	0	0	0	0	0	0	0	0	0	0	0	0	0	0	0	0	0	0	0	0	0	0	0	0	0	0	0	0	0	0	0	0	0	0	0
		Non-skeletal allochems (calcite)					0	0	0	0	0	0	0	0	0	0	0	0	0	0	0	0	0	0	0	0	0	0	0	0	0	0	0.333333	0	0	0	0	0	0	0	0	0	0	0	0	0	0	0	0
	Matrix (cryptocrystalline calcite)						0	0	0	0	0	0	0	0	0	0	0	0	0.334448	0	0	0	0	0	0	0	0	0	0	0	0	0	0	0	0	0	0	0	0	0	0	0	0	0	0	0	0	0	0
		Micrite (calcite)					0	0	0	0	0	0	0	0	0	0	0	0	0.334448	0	0	0	0	0	0	0	0	0	0	0	0	0	0	0	0	0	0	0	0	0	0	0	0	0	0	0	0	0	0
	Allochems (cryptocrystalline dolomite)						0.333333	0	3.33333	1	0	0	0	1.33333	0	0	0	1.33333	2.00669	0.333333	1	0	2	1.66667	0	0	0	0	0	0	0	5.33333	33	7	3.33333	0	0.666667	0	1	0	0	0.333333	0	0	0	0	0	0	0
		Skeletal allochems (dolomite)					0	0	0	0	0	0	0	0	0	0	0	0	0	0	0	0	0	0	0	0	0	0	0	0	0	0	0	0	0	0	0	0	0	0	0	0	0	0	0	0	0	0	0
		Non-skeletal allochems (dolomite)					0.333333	0	3.33333	1	0	0	0	1.33333	0	0	0	1.33333	2.00669	0.333333	1	0	2	1.66667	0	0	0	0	0	0	0	5.33333	33	7	3.33333	0	0.666667	0	1	0	0	0.333333	0	0	0	0	0	0	0
	Matrix (cryptocrystalline dolomite)						5.33333	9.33333	8.33333	0.333333	0	0	0	0	0.333333	6.33333	6.33333	5.66667	44.8161	3.33333	27.3333	0	11	2.66667	6	0.333333	3.66667	6	8.66667	4.33333	5.66667	9	5.66667	2	18.6667	2.66667	3.33333	50.3333	28	23	1.66667	4.33333	2.66667	1	0.333333	0.333333	0.666667	0.333333	1
		Micrite					5.33333	9.33333	8.33333	0.333333	0	0	0	0	0.333333	6.33333	6.33333	5.66667	44.8161	3.33333	27.3333	0	11	2.66667	6	0.333333	3.66667	6	8.66667	4.33333	5.66667	9	5.66667	2	18.6667	2.66667	3.33333	50.3333	28	23	1.66667	4.33333	2.66667	1	0.333333	0.333333	0.666667	0.333333	1
	Total replacive dolomite						79	41	48	53	2.66667	39.3333	12	42.6667	48.3333	4.33333	1.33333	17.6667	20.4013	54.3333	50	74.3333	56.3333	59.6667	80	70.3333	66.3333	37	84.6667	47.3333	61.3333	23.6667	15.6667	40.6667	51.3333	42.6667	59.6667	33.6667	40.3333	53.3333	78	65.6667	50.3333	26.3333	24.6667	15.6667	68.3333	66.6667	56
		Microcrystalline dolomite					7.66667	19.6667	14.3333	50.3333	1.66667	12	10	9.66667	47.6667	0.666667	0	8.66667	18.0602	12.6667	26	0.333333	13	15.3333	11	0	1.66667	8	13.6667	0	22.6667	2.33333	15.6667	19.6667	39	5	0	4	1.33333	0.333333	1.66667	1	1.33333	1.33333	0	0.666667	4.33333	1	1.33333
		Planar dolomite					3	0	1	0.333333	0	2.33333	0	0	0	0	0	0	0.334448	0.666667	0.666667	3.33333	1	0.666667	1.66667	4	2.33333	4	1	1	1	0.333333	0	0.666667	0.333333	3.33333	3.33333	3.33333	3.33333	3.66667	1.66667	10	4.33333	5.66667	6	1.33333	12	13	18.3333
			Planar-s				3	0	1	0.333333	0	2.33333	0	0	0	0	0	0	0.334448	0.666667	0.666667	3.33333	1	0.666667	1.66667	3	2.33333	4	1	1	1	0.333333	0	0.666667	0.333333	3	3.33333	0	1	2.66667	1.66667	8	4	2.66667	2	0.666667	12	13	14.6667
			Planar-e				0	0	0	0	0	0	0	0	0	0	0	0	0	0	0	0	0	0	0	0	0	0	0	0	0	0	0	0	0	0	0	0	0	0	0	2	0.333333	0	0	0	0	0	3.66667
			Planar-p				0	0	0	0	0	0	0	0	0	0	0	0	0	0	0	0	0	0	0	1	0	0	0	0	0	0	0	0	0	0.333333	0	3.33333	2.33333	1	0	0	0	3	4	0.666667	0	0	0
		Non-planar dolomite					68.3333	21.3333	32.6667	2.33333	1	25	2	33	0.666667	3.66667	1.33333	9	2.00669	41	23.3333	70.6667	42.3333	43.6667	67.3333	66.3333	62.3333	25	70	46.3333	37.6667	21	0	20.3333	12	34.3333	56.3333	26.3333	35.6667	49.3333	74.6667	54.6667	44.6667	19.3333	18.6667	13.6667	52	52.6667	36.3333
			Non-planar-a				68.3333	21.3333	28.6667	2.33333	0	24.6667	2	30.3333	0.333333	0.666667	0	7.66667	1.33779	38	23.3333	70.6667	42.3333	37.6667	64.6667	63.3333	62.3333	25	70	46.3333	35.6667	21	0	20.3333	12	30.6667	56	4.66667	25.3333	41.6667	74.3333	54.6667	42.6667	10.3333	12	9.66667	52	52.6667	36.3333
			Non-planar-p				0	0	4	0	1	0.333333	0	2.66667	0.333333	3	1.33333	1.33333	0.668896	3	0	0	0	6	2.66667	3	0	0	0	0	2	0	0	0	0	3.66667	0.333333	21.6667	10.3333	7.66667	0.333333	0	2	9	6.66667	4	0	0	0
			Saddle dolomite				0	0	0	0	0	0	0	0	0	0	0	0	0	0	0	0	0	0	0	0	0	0	0	0	0	0	0	0	0	0	0	0	0	0	0	0	0	0	0	0	0	0	0
	Dolomite cements						1.66667	0.333333	2	9.66667	0	0	7.66667	1.33333	0	0	0	1	1.67224	0.333333	1	6.33333	1.33333	1	0	0.666667	1	2	1	0.333333	0	4.33333	20.6667	4.66667	10.3333	0.333333	1.66667	1	1	0.333333	2.33333	6.33333	9.33333	0	1.33333	0	9.66667	7.66667	18
		Pore-filling planar					1	0	0	8	0	0	4.33333	0	0	0	0	0	0	0	0	4	0	0	0	0.666667	0	1	0	0.333333	0	0	0	0	0.333333	0	0	0	0	0	1.66667	5	3.33333	0	1	0	6.66667	7.66667	15
		Pore-filling non-planar					0.333333	0	0	1.33333	0	0	3.33333	0	0	0	0	0	0	0	0	2.33333	0	0	0	0	0	1	0	0	0	0	5.33333	1	3.66667	0.333333	0	0	0	0	0.333333	1.33333	5.66667	0	0.333333	0	3	0	3
		Overgrowth					0.333333	0.333333	2	0.333333	0	0	0	1.33333	0	0	0	1	1.67224	0.333333	1	0	1.33333	1	0	0	0	0	1	0	0	4.33333	15.3333	3.66667	6.33333	0	1.66667	1	1	0.333333	0.333333	0	0.333333	0	0	0	0	0	0
		Fracture-filling					0	0	0	0	0	0	0	0	0	0	0	0	0	0	0	0	0	0	0	0	1	0	0	0	0	0	0	0	0	0	0	0	0	0	0	0	0	0	0	0	0	0	0
	Gypsum/Anhydrite						8.66667	12	11.3333	9	2.33333	28	0.666667	5.33333	18.3333	78.3333	84	67	27.0903	1	7.66667	4.33333	21	26.3333	1.66667	26	22	10	2	38.6667	27.6667	21.3333	6	35	2	43.6667	27.6667	15	6	2	5.66667	9	13	2.33333	9	6.66667	0.333333	1.33333	1.33333
		Replacive laths					2.66667	3	4	0.333333	0	11	0	2	5.33333	0	0	2.66667	7.02341	0	1.33333	1.66667	11.3333	12.6667	0.333333	6.66667	3	4	1.33333	4.33333	5.33333	19	0.666667	9.33333	0.333333	8	7.33333	15	2	1	1.33333	2	6.66667	0.333333	2	0.666667	0	0	0
		Replacive/displacive nodules					3	1.66667	0.666667	0	0	11.6667	0	0	4.66667	78.3333	84	60.3333	16.0535	0	0.666667	0	7.33333	10	0	17.6667	7.66667	0	0	31.6667	21	0	0	23.6667	0	27.6667	18.6667	0	1.33333	0	1.33333	3.66667	3	0.666667	4	4.66667	0	0	0
		Pore filling					1.66667	2.33333	6.66667	8.66667	2.33333	5	0.666667	3.33333	8	0	0	3.66667	2.67559	0.666667	0.666667	2.66667	1.66667	2.33333	1.33333	1.66667	4.33333	3	0.666667	0.333333	1.33333	2.33333	5.33333	2	1.66667	2.66667	1.66667	0	2.66667	1	3	3.33333	3.33333	1.33333	3	1.33333	0.333333	1.33333	1.33333
		Fracture-filling					0	0	0	0	0	0	0	0	0	0	0	0	0	0	0	0	0	0	0	0	1	0	0	0	0	0	0	0	0	0	0	0	0	0	0	0	0	0	0	0	0	0	0
	Halite						0	0	0	18.6667	91.6667	8	69.3333	32.6667	18.3333	1	0	0	0	1.33333	0	0	0	0	0	0	0	1	0	0	0	0	0	0	0	0	0	0	0	0	0	0	0	0	0	0	5	0	0
		Replacive					0	0	0	0	0	0	0	0	0	0	0	0	0	0	0	0	0	0	0	0	0	0	0	0	0	0	0	0	0	0	0	0	0	0	0	0	0	0	0	0	0	0	0
		Pore filling					0	0	0	18.3333	91.6667	6.33333	68	28.6667	13	1	0	0	0	1.33333	0	0	0	0	0	0	0	1	0	0	0	0	0	0	0	0	0	0	0	0	0	0	0	0	0	0	5	0	0
		Fracture-filling					0	0	0	0.333333	0	1.66667	1.33333	4	5.33333	0	0	0	0	0	0	0	0	0	0	0	0	0	0	0	0	0	0	0	0	0	0	0	0	0	0	0	0	0	0	0	0	0	0
	Calcite						0	17.3333	0	0	0	0	0	0	0	0	0	0	3.01003	19	7.33333	0	0.666667	0	0	0	0	0	0	0	0	1	0	0	0.333333	1.33333	0	0	22	11.3333	7.33333	0	10.3333	57	50	69	0	11	0
		Neomorphic/Replacive (D-dolomite)					0	12.3333	0	0	0	0	0	0	0	0	0	0	0.668896	5	0.666667	0	0	0	0	0	0	0	0	0	0	0	0	0	0	0	0	0	18	5.66667	1.33333	0	6.33333	47	40.3333	55.6667	0	2	0
		Pore-filling					0	3.66667	0	0	0	0	0	0	0	0	0	0	2.34114	13.3333	2.33333	0	0.666667	0	0	0	0	0	0	0	0	0	0	0	0.333333	1.33333	0	0	3.66667	5.33333	5.66667	0	3.33333	9.33333	9.66667	13.3333	0	6.66667	0
		Fracture-filling					0	1.33333	0	0	0	0	0	0	0	0	0	0	0	0.666667	4.33333	0	0	0	0	0	0	0	0	0	0	1	0	0	0	0	0	0	0.333333	0.333333	0.333333	0	0.666667	0.666667	0	0	0	2.33333	0
	Quartz						0	0	0	0	0	0.333333	0	0	0	0	0	0	0	16.3333	1	0	0	0	0	0	0	0	0	0	0	26.6667	0	0	0	0	0	0	0	0	0	0	0	0	0.333333	0	0	0	0
		Replacive					0	0	0	0	0	0	0	0	0	0	0	0	0	14.3333	1	0	0	0	0	0	0	0	0	0	0	22.6667	0	0	0	0	0	0	0	0	0	0	0	0	0	0	0	0	0
		Pore-filling					0	0	0	0	0	0.333333	0	0	0	0	0	0	0	2	0	0	0	0	0	0	0	0	0	0	0	4	0	0	0	0	0	0	0	0	0	0	0	0	0.333333	0	0	0	0
		Fracture-filling					0	0	0	0	0	0	0	0	0	0	0	0	0	0	0	0	0	0	0	0	0	0	0	0	0	0	0	0	0	0	0	0	0	0	0	0	0	0	0	0	0	0	0
	Pyrite						0	0	0	0	0	0	0	0	0	0	0	0	0	0	0	0	0	0	0	0	0	0	0	0	0	0	0	0	0	0	0	0	0	0	0	0	0	0	0	0	0	0	0
		Replacive					0	0	0	0	0	0	0	0	0	0	0	0	0	0	0	0	0	0	0	0	0	0	0	0	0	0	0	0	0	0	0	0	0	0	0	0	0	0	0	0	0	0	0
		Cement					0	0	0	0	0	0	0	0	0	0	0	0	0	0	0	0	0	0	0	0	0	0	0	0	0	0	0	0	0	0	0	0	0	0	0	0	0	0	0	0	0	0	0
	Residual hydrocarbon						3.66667	19.3333	25	6.66667	1.66667	22.6667	10.3333	16.6667	14.3333	9	7	4.33333	0.334448	0.333333	3.66667	0.333333	3.66667	2.66667	7.66667	1	2	22	3	7	5	8.33333	8.33333	2.66667	6	7.66667	3	0	1.33333	8.33333	2	6	14.3333	9.66667	10.6667	4.66667	2.66667	5.33333	3
		Pore Filling					2	6.66667	3.33333	0	1.66667	16.6667	2.33333	11.6667	4.33333	5	3	1.66667	0.334448	0.333333	1	0.333333	0.666667	0.666667	3.66667	1	1	8	2.33333	6.66667	1.66667	6	6.33333	1	3.33333	4	1.33333	0	1.33333	3	1	3.66667	7.66667	4.33333	7.33333	3	2.66667	4	2.33333
		Grain Rimming					1.66667	10.6667	19.6667	4	0	6	8	5	10	4	4	2.66667	0	0	0.666667	0	0.666667	0	2.33333	0	1	11	0.666667	0	2	1.33333	2	0	2	1.66667	0.666667	0	0	2.66667	1	2.33333	3	3	3.33333	1.33333	0	1	0.666667
		Fracture Filling					0	0.333333	1	1.66667	0	0	0	0	0	0	0	0	0	0	0	0	0	0	0	0	0	0	0	0.333333	0	0	0	0	0	0	0	0	0	0	0	0	0	0	0	0	0	0.333333	0
		Stylolite					0	1.66667	1	1	0	0	0	0	0	0	0	0	0	0	2	0	2.33333	2	1.66667	0	0	3	0	0	1.33333	1	0	1.66667	0.666667	2	1	0	0	2.66667	0	0	3.66667	2.33333	0	0.333333	0	0	0
	Total modal porosity						1.33333	0.666667	2	1.66667	1.66667	1.66667	0	0	0.333333	1	1.33333	3	0.334448	3.66667	1	14.6667	4	6	4.66667	1.66667	5	22	0.666667	2.33333	0.333333	0.333333	10.3333	8	8	1.66667	4	0	0.333333	1.66667	3	8.33333	0	3.66667	3.66667	3.66667	13.3333	7.66667	20.6667
		Primary macroporosity					0	0	0	0	0	0	0	0	0	0	0	0	0	0	0	0	0	0	0	0	0	0	0	0	0	0	3	0	0	0	0	0	0	0	0	0	0	0	0	0	0	0	0
			Primary interparticle				0	0	0	0	0	0	0	0	0	0	0	0	0	0	0	0	0	0	0	0	0	0	0	0	0	0	3	0	0	0	0	0	0	0	0	0	0	0	0	0	0	0	0
			Fenestral				0	0	0	0	0	0	0	0	0	0	0	0	0	0	0	0	0	0	0	0	0	0	0	0	0	0	0	0	0	0	0	0	0	0	0	0	0	0	0	0	0	0	0
			Primary intraparticle				0	0	0	0	0	0	0	0	0	0	0	0	0	0	0	0	0	0	0	0	0	0	0	0	0	0	0	0	0	0	0	0	0	0	0	0	0	0	0	0	0	0	0
		Secondary macroporosity					1.33333	0.666667	2	1.66667	1.66667	1.66667	0	0	0.333333	1	1.33333	3	0.334448	3.66667	1	14.6667	4	6	4.66667	1.66667	5	22	0.666667	2.33333	0.333333	0.333333	7.33333	8	8	1.66667	4	0	0.333333	1.66667	3	8.33333	0	3.66667	3.66667	3.66667	13.3333	7.66667	20.6667
			Intercrystalline				0.666667	0	0	0	0	0	0	0	0	0	0.333333	2	0	1	0	0.666667	2.33333	1.33333	2.66667	0	1.33333	0	0	1	0	0	0.333333	1	0.666667	0.333333	3.66667	0	0	0	0	2	0	0.333333	0	0.666667	0.666667	3.33333	3
			Mouldic				0	0	0	0	0	0	0	0	0	0	0	0	0	0	0	0	0	0.666667	0	0	0	0	0	0	0	0	5	4.33333	3	0	0	0	0	0	0	0	0	0	0	0	0	0	0
				Isolated			0	0	0	0	0	0	0	0	0	0	0	0	0	0	0	0	0	0.666667	0	0	0	0	0	0	0	0	4.66667	4	3	0	0	0	0	0	0	0	0	0	0	0	0	0	0
				Connected			0	0	0	0	0	0	0	0	0	0	0	0	0	0	0	0	0	0	0	0	0	0	0	0	0	0	0.333333	0.333333	0	0	0	0	0	0	0	0	0	0	0	0	0	0	0
			Vugs				0.666667	0.666667	2	1	1	0.333333	0	0	0.333333	1	1	1	0.334448	1	0	14	1.66667	3.66667	1	1.33333	2.66667	11	0.333333	1.33333	0	0.333333	1.66667	2.33333	3.66667	1.33333	0	0	0.333333	1.66667	3	6.33333	0	2.33333	2.66667	3	10.3333	4.33333	17
				Isolated			0.333333	0.666667	1.33333	0.666667	1	0	0	0	0.333333	1	1	1	0.334448	1	0	3	1.33333	3.66667	1	0.333333	2.66667	1	0.333333	1.33333	0	0	1.66667	1.66667	2.66667	0.333333	0	0	0.333333	1.66667	2.33333	3.33333	0	1.33333	1.66667	1.66667	6	1.33333	7.66667
				Touching			0.333333	0	0.666667	0.333333	0	0.333333	0	0	0	0	0	0	0	0	0	11	0.333333	0	0	1	0	10	0	0	0	0.333333	0	0.666667	1	1	0	0	0	0	0.666667	3	0	1	1	1.33333	4.33333	3	9.33333
			Secondary intraparticle				0	0	0	0	0	0	0	0	0	0	0	0	0	0	0	0	0	0	0	0	0	0	0	0	0	0	0	0	0	0	0	0	0	0	0	0	0	0	0	0	0	0	0
			Fractures (macroporosity)				0	0	0	0.666667	0.666667	1.33333	0	0	0	0	0	0	0	1.66667	1	0	0	0.333333	1	0	1	9	0.333333	0	0.333333	0	0.333333	0.333333	0.333333	0	0.333333	0	0	0	0	0	0	1	1	0	0.333333	0	0
			Channel				0	0	0	0	0	0	0	0	0	0	0	0	0	0	0	0	0	0	0	0.333333	0	2	0	0	0	0	0	0	0.333333	0	0	0	0	0	0	0	0	0	0	0	2	0	0.666667
[truncated: 4 more columns]

## Sheet: G-3H2

X	X	X	X	X	X	I	G3-1	G3-2	G3-3	G3-4	G3-5	G3-6	G3-7	G3-8	G3-9	G3-10	G3-11	G3-12	G3-13	G3-14	G3-15	G3-16	G3-17	G3-18	G3-19	G3-20	G3-21	G3-22A	G3-22B	G3-23	G3-24	G3-25	G3-26	G3-27	G3-28	G3-29	G3-30	G3-31	G3-32	G3-33	G3-34	G3-35	G3-36	G3-37	G3-38	G3-39	G3-40	G3-41	G3-42
	Sequence						5	4	4	4	4	4	4	4	4	3	3	3	3	3	3	3	3	3	3	3	3	2	2	2	2	2	2	2	2	2	2	2	2	2	1	1	1	1	1	1	1	1	1
	depth (m dd DFE)						4934.16	4936.51	4939.3	4941.49	4946.62	4949.23	4951.48	4952.04	4954	4956.48	4959.07	4961.37	4963.9	4966.44	4969.17	4971	4972.96	4975.1	4975.51	4977.73	4980.06	4982.43	4982.43	4985.1	4983.82	4987.56	4989.65	4990.1	4992.5	4995.12	4997.76	4999.58	5000.12	5002.76	5005.5	5006.81	5007.55	5010.4	5012.71	5015.17	5017.7	5020.42	5021.65
	Allochems (cryptocrystalline calcite)						0	0	0	0	0	0	0	0	0	0	0	0	0	0	0	0	0	0	0	0	0	0	0	0	0	0	0	0	0	0	0	0	0	0	0	0	0	0	0	0	0	0	0
		Skeletal allochems (calcite)					0	0	0	0	0	0	0	0	0	0	0	0	0	0	0	0	0	0	0	0	0	0	0	0	0	0	0	0	0	0	0	0	0	0	0	0	0	0	0	0	0	0	0
		Non-skeletal allochems (calcite)					0	0	0	0	0	0	0	0	0	0	0	0	0	0	0	0	0	0	0	0	0	0	0	0	0	0	0	0	0	0	0	0	0	0	0	0	0	0	0	0	0	0	0
	Matrix (cryptocrystalline calcite)						0	0	0	0	0	0	0	0	0	0	0	0	0	0	0	0	0	0	0	0	0	0	0	0	0	0	0	0	0	0	0	0	0	0	0	0	0	0	0	0	0	0	0
		Micrite (calcite)					0	0	0	0	0	0	0	0	0	0	0	0	0	0	0	0	0	0	0	0	0	0	0	0	0	0	0	0	0	0	0	0	0	0	0	0	0	0	0	0	0	0	0
	Allochems (cryptocrystalline dolomite)						0	0	0	0	0	0	0	0	28.1369	3.39506	0	0.341297	0.337838	0	0	0	0	0	0	0	0	0	0	0	0	0	0	0	0	0	0	0	0	0	0	0	0	0	0	0	0	0	0
		Skeletal allochems (dolomite)					0	0	0	0	0	0	0	0	0	0	0	0	0	0	0	0	0	0	0	0	0	0	0	0	0	0	0	0	0	0	0	0	0	0	0	0	0	0	0	0	0	0	0
		Non-skeletal allochems (dolomite)					0	0	0	0	0	0	0	0	28.1369	3.39506	0	0.341297	0.337838	0	0	0	0	0	0	0	0	0	0	0	0	0	0	0	0	0	0	0	0	0	0	0	0	0	0	0	0	0	0
	Matrix (cryptocrystalline dolomite)						0	0.657895	0.327869	1.66667	3.98671	2.66667	0	0	27.5665	3.39506	0	0.341297	0.337838	0	0.333333	0	0	0	0	0	0	0	0.332226	0	0	0	0	0	0	0	0	0	0	0	0	0	0	0	0	0	0	1.33336	0.331126
		Micrite					0	0.657895	0.327869	1.66667	3.98671	2.66667	0	0	27.5665	3.39506	0	0.341297	0.337838	0	0.333333	0	0	0	0	0	0	0	0.332226	0	0	0	0	0	0	0	0	0	0	0	0	0	0	0	0	0	0	1.33336	0.331126
	Total replacive dolomite						87.6667	68.4211	88.5246	82.3333	80.3987	86.3333	79.7342	81.6667	2.28137	66.358	83	83.2765	72.973	75	86	88	68.6667	78.5479	80.404	78.7375	84.6667	78.6885	80.3987	84	77	75	81.0631	80	43	80.3509	85.3333	60.1329	70.8738	72.6667	76.2542	74.3333	83.8284	26	62.6667	8.12678	78	57.3326	39.0728
		Microcrystalline dolomite					9	8.88158	4.91803	10	8.9701	16.6667	6.31229	10.6667	1.52091	6.79012	7.33333	4.09556	3.37838	3.66667	5.66667	12	14.3333	2.31023	8.9949	5.31561	4.33333	1.96721	3.65449	0.666667	5.66667	4.66667	6.31229	3.33333	4	4.5614	1.66667	1.99336	4.20712	5.33333	6.35452	6.33333	14.1914	3	1.66667	0	12.6667	18.667	11.5894
		Planar dolomite					13.3333	9.86842	7.86885	8	21.2625	7	8.9701	8.33333	0.190114	8.95062	4.66667	10.9215	6.41892	7.33333	8.66667	6.66667	9.33333	6.93069	8.60324	8.9701	8.66667	20.6557	14.6179	28.6667	13.6667	9.66667	5.98007	8.66667	5.66667	14.0351	8	13.6213	16.8285	11	12.709	28	9.24092	5.66667	15.3333	3.56248	8.33333	8.66514	6.95364
			Planar-s				13.3333	9.53947	7.54098	8	20.9302	7	8.9701	7.33333	0.190114	8.95062	4.66667	10.9215	5.74324	7.33333	8.66667	6.66667	9.33333	6.60066	8.26879	8.9701	8.66667	19.3443	14.6179	28.3333	13.6667	9.66667	5.98007	6.66667	4.33333	13.6842	7.66667	13.6213	16.1812	9.66667	12.709	26.6667	9.24092	5.33333	12.6667	0.323862	7.66667	5.66676	3.31126
			Planar-e				0	0.328947	0.327869	0	0.332226	0	0	1	0	0	0	0	0.675676	0	0	0	0	0.330033	0.334448	0	0	1.31148	0	0.333333	0	0	0	1.66667	0.666667	0.350877	0	0	0.647249	0	0	1.33333	0	0	2.66667	0.323862	0.666667	1.99837	2.31788
			Planar-p				0	0	0	0	0	0	0	0	0	0	0	0	0	0	0	0	0	0	0	0	0	0	0	0	0	0	0	0.333333	0.666667	0	0.333333	0	0	1.33333	0	0	0	0.333333	0	2.91476	0	1.00002	1.3245
		Non-planar dolomite					65.3333	49.6711	75.7377	64.3333	50.1661	62.6667	64.4518	62.6667	0.570342	50.6173	71	68.2594	63.1757	64	71.6667	69.3333	45	69.3069	62.8058	64.4518	71.6667	56.0656	62.1262	54.6667	57.6667	60.6667	68.7708	68	33.3333	61.7544	75.6667	44.5183	49.8382	56.3333	57.1906	40	60.396	17.3333	45.6667	4.5643	57	30.0005	20.5298
			Non-planar-a				65.3333	49.6711	75.7377	64.3333	49.8339	62.6667	64.4518	62.6667	0.570342	50.6173	71	68.2594	63.1757	64	71.6667	69.3333	45	69.3069	62.8058	64.4518	71.6667	56.0656	61.794	54.6667	57.6667	60.6667	68.7708	67.6667	31.6667	61.7544	75	44.5183	49.8382	54.6667	57.1906	40	60.396	17	45.3333	1.30408	57	28.3338	17.5497
			Non-planar-p				0	0	0	0	0.332226	0	0	0	0	0	0	0	0	0	0	0	0	0	0	0	0	0	0.332226	0	0	0	0	0.333333	1.66667	0	0.666667	0	0	1.66667	0	0	0	0.333333	0.333333	3.26021	0	1.66669	2.98013
			Saddle dolomite				0	0	0	0	0	0	0	0	0	0	0	0	0	0	0	0	0	0	0	0	0	0	0	0	0	0	0	0	0	0	0	0	0	0	0	0	0	0	0	0	0	0	0
	Dolomite cements						0.333333	0.657895	0	0.333333	0.664452	3.33333	1.99336	3	30.038	11.4198	0.333333	2.04778	4.72973	0.666667	1	0	0	0.330033	4.01338	0.332226	1	0	0.996678	0.333333	0.333333	0.666667	0	0	0	5.26316	2.66667	2.65781	0.970874	1.33333	1.67224	1.33333	0.660066	0	10.6667	5.52509	1.66667	0	0.993377
		Pore-filling planar					0	0	0	0	0	0	0	0	0	0	0	1.02389	2.02703	0.666667	0.666667	0	0	0	3.01003	0.332226	0	0	0.664452	0.333333	0.333333	0.666667	0	0	0	4.21053	1.33333	2.32558	0.647249	0.333333	1.67224	1	0.660066	0	8.33333	4.87305	1.66667	0	0.993377
		Pore-filling non-planar					0.333333	0.657895	0	0	0	0	0	0	22.8137	4.32099	0	0	0.337838	0	0	0	0	0.330033	0.668896	0	0	0	0.332226	0	0	0	0	0	0	1.05263	1.33333	0.332226	0.323625	1	0	0.333333	0	0	2.33333	0.652042	0	0	0
		Overgrowth					0	0	0	0	0.664452	3.33333	1.99336	3	6.08365	7.09877	0	1.02389	2.36486	0	0.333333	0	0	0	0.334448	0	1	0	0	0	0	0	0	0	0	0	0	0	0	0	0	0	0	0	0	0	0	0	0
		Fracture-filling					0	0	0	0.333333	0	0	0	0	1.14068	0	0.333333	0	0	0	0	0	0	0	0	0	0	0	0	0	0	0	0	0	0	0	0	0	0	0	0	0	0	0	0	0	0	0	0
	Gypsum/Anhydrite						7	11.5132	5.57377	4.33333	7.6412	5.33333	5.64784	9.33333	6.46388	9.25926	8.66667	7.50853	9.12162	10.3333	5.66667	2.66667	15	11.5512	8.28199	8.30565	5.33333	8.52459	6.97674	2.33333	9.66667	13.3333	12.9568	14	28	7.36842	8.33333	26.9103	9.38511	19.3333	10.3679	8.66667	5.94059	49.6667	22.6667	78.2365	8	4.66674	12.5828
		Replacive laths					3.66667	7.23684	2.95082	0.666667	5.64784	4.33333	3.65449	3	1.3308	3.08642	1.66667	2.73038	6.41892	5	2	1.33333	9	6.93069	3.31368	3.32226	1.33333	3.93443	1.99336	1.33333	6	10	6.97674	6.66667	13	4.91228	5.33333	15.6146	4.85437	12.6667	4.34783	3.33333	0.990099	16.6667	12	2.28215	3.33333	1.66669	4.63576
		Replacive/displacive nodules					0	0	0	1	0	0	0	0.666667	0	0	0	3.07167	0	0	0	0	0	0	0	0.996678	0.333333	0.327869	0	0	0.666667	0	3.98671	4.66667	10.3333	0	0.333333	10.299	0	3.66667	0	0	0.990099	28	0.666667	74.6589	0	0	0
		Pore filling					3	4.27632	2.29508	1.33333	1.66113	1	1.99336	5.66667	4.37262	0.308642	2.33333	1.70648	2.7027	5.33333	3.33333	1.33333	6	4.62046	4.63827	3.98671	3.33333	3.60656	3.32226	1	3	3.33333	1.66113	2.33333	4.66667	2.45614	2.66667	0.996678	4.53074	2.66667	6.02007	5	3.9604	5	10	1.29545	4.33333	3.00005	7.94702
		Fracture-filling					0	0	0	0.333333	0	0	0	0	1.14068	0	0.333333	0	0	0	0	0	0	0	0	0	0	0	0	0	0	0	0	0	0	0	0	0	0	0	0	0	0	0	0	0	0	0	0
	Halite						0.333333	0.986842	1.63934	0	2.99003	0	0.332226	1.66667	0	0.308642	0.333333	0	0	0.333333	0.666667	0	0.333333	0	0.334448	0	0	1.31148	0	0	0.333333	0.333333	0.332226	0	0	0	0	1.3289	0.647249	0.333333	0.668896	3	0.330033	4	0	1.61931	1.66667	32.6672	45.0331
		Replacive					0	0	0	0	0	0	0	0	0	0	0	0	0	0	0	0	0	0	0	0	0	0	0	0	0	0	0.332226	0	0	0	0	0	0	0	0	0	0	0	0	0	0	0	0
		Pore filling					0.333333	0.986842	1.63934	0	2.99003	0	0.332226	1.66667	0	0.308642	0.333333	0	0	0.333333	0.666667	0	0.333333	0	0.334448	0	0	1.31148	0	0	0.333333	0.333333	0	0	0	0	0	1.3289	0.647249	0.333333	0.668896	3	0.330033	3.33333	0	1.61931	1.33333	24.3337	42.7152
		Fracture-filling					0	0	0	0	0	0	0	0	0	0	0	0	0	0	0	0	0	0	0	0	0	0	0	0	0	0	0	0	0	0	0	0	0	0	0	0	0	0.666667	0	0	0.333333	8.33347	2.31788
	Calcite						0	0	0	8.33333	0	0	0	0	0	0	0	0	0	0	0	0	0	0	0	0	0	0	0	0	0	0	0	0	0	0	0	0	0	0	0	0	0	0	0	0	0	0	0
		Neomorphic/Replacive (D-dolomite)					0	0	0	3.33333	0	0	0	0	0	0	0	0	0	0	0	0	0	0	0	0	0	0	0	0	0	0	0	0	0	0	0	0	0	0	0	0	0	0	0	0	0	0	0
		Pore-filling					0	0	0	2	0	0	0	0	0	0	0	0	0	0	0	0	0	0	0	0	0	0	0	0	0	0	0	0	0	0	0	0	0	0	0	0	0	0	0	0	0	0	0
		Fracture-filling					0	0	0	3	0	0	0	0	0	0	0	0	0	0	0	0	0	0	0	0	0	0	0	0	0	0	0	0	0	0	0	0	0	0	0	0	0	0	0	0	0	0	0
	Quartz						0	0	0	0	0.664452	0	0	1	0	0	2.33333	0	0	0	0	0	0	0	0	0	0	0	0	0	0	0	0	0	3.66667	0	0	0.996678	0.323625	0.333333	1.67224	1.33333	0	15.3333	0	1.30193	1.66667	0	0
		Replacive					0	0	0	0	0.664452	0	0	1	0	0	1.33333	0	0	0	0	0	0	0	0	0	0	0	0	0	0	0	0	0	3.66667	0	0	0.996678	0	0.333333	1.67224	0.666667	0	14.6667	0	1.30193	1.66667	0	0
		Pore-filling					0	0	0	0	0	0	0	0	0	0	1	0	0	0	0	0	0	0	0	0	0	0	0	0	0	0	0	0	0	0	0	0	0.323625	0	0	0.666667	0	0.666667	0	0	0	0	0
		Fracture-filling					0	0	0	0	0	0	0	0	0	0	0	0	0	0	0	0	0	0	0	0	0	0	0	0	0	0	0	0	0	0	0	0	0	0	0	0	0	0	0	0	0	0	0
	Pyrite						0	0	0	0	0	0	0.996678	1.66667	0.190114	0	0	0	0	0	0	0	0	0	0	0	0	0	0	0	0	0	0	0	0	0	0	0	0	0	0	0	0	0	0	0	0	0.333339	0.331126
		Replacive					0	0	0	0	0	0	0.996678	1.66667	0.190114	0	0	0	0	0	0	0	0	0	0	0	0	0	0	0	0	0	0	0	0	0	0	0	0	0	0	0	0	0	0	0	0	0.333339	0.331126
		Cement					0	0	0	0	0	0	0	0	0	0	0	0	0	0	0	0	0	0	0	0	0	0	0	0	0	0	0	0	0	0	0	0	0	0	0	0	0	0	0	0	0	0	0
	Residual hydrocarbon						0.333333	2.30263	1.63934	1.66667	0	1.66667	1.66113	0.666667	0.380228	3.08642	4	4.09556	1.35135	0.666667	0.666667	2	1.66667	1.32013	1.32019	2.32558	0.333333	2.95082	1.99336	2.33333	2.66667	1.66667	2.99003	2.66667	0	1.40351	1.33333	0.996678	2.91262	0.666667	3.01003	6.66667	4.29043	0.666667	1.33333	4.86657	8	3.66673	1.65563
		Pore Filling					0.333333	0.986842	0.983607	0.666667	0	0.666667	1.3289	0.666667	0.190114	1.54321	2	1.70648	0.337838	0.333333	0.666667	1.33333	1.66667	1.32013	0.660095	1.3289	0.333333	0.327869	0.664452	0	1.66667	1	1.99336	1.33333	0	0.701754	0.333333	0.996678	0.970874	0.333333	1.67224	4.66667	3.30033	0.333333	0.666667	3.24726	5	1.33336	0.662252
		Grain Rimming					0	0.986842	0.655738	0.333333	0	1	0.332226	0	0	0.617284	1	2.38908	1.01351	0.333333	0	0.333333	0	0	0.330048	0.996678	0	1.31148	0.664452	1	1	0.333333	0.664452	1	0	0.701754	0.333333	0	1.61812	0	1.33779	1.66667	0.990099	0.333333	0.666667	1.61931	1.66667	2.33337	0.993377
		Fracture Filling					0	0	0	0.333333	0	0	0	0	0.190114	0.308642	0	0	0	0	0	0	0	0	0	0	0	0.983607	0.664452	1	0	0.333333	0.332226	0	0	0	0.666667	0	0	0	0	0	0	0	0	0	0.666667	0	0
		Stylolite					0	0.328947	0	0.333333	0	0	0	0	0	0.617284	1	0	0	0	0	0.333333	0	0	0.330048	0	0	0.327869	0	0.333333	0	0	0	0.333333	0	0	0	0	0.323625	0.333333	0	0.333333	0	0	0	0	0.666667	0	0
	Total modal porosity						4.33333	15.4605	2.29508	1.33333	3.65449	0.666667	9.63455	1	4.94297	2.77778	1.33333	2.38908	11.1486	13	5.66667	7.33333	14.3333	8.25083	5.64601	10.299	8.66667	8.52459	9.30233	11	10	9	2.65781	3.33333	25.3333	5.61404	2.33333	6.97674	14.8867	5.33333	6.35452	4.66667	4.9505	4.33333	2.66667	0.323862	1	0	0
		Primary macroporosity					0	0	0.327869	0.333333	0.332226	0.333333	0	0	0	0	0	0	0	0	0	0	0	0	0	0	0	0	0	0	0	0	0	0	0	0	0	0	0	0	0	0	0	0	0	0	0	0	0
			Primary interparticle				0	0	0.327869	0.333333	0.332226	0.333333	0	0	0	0	0	0	0	0	0	0	0	0	0	0	0	0	0	0	0	0	0	0	0	0	0	0	0	0	0	0	0	0	0	0	0	0	0
			Fenestral				0	0	0	0	0	0	0	0	0	0	0	0	0	0	0	0	0	0	0	0	0	0	0	0	0	0	0	0	0	0	0	0	0	0	0	0	0	0	0	0	0	0	0
			Primary intraparticle				0	0	0	0	0	0	0	0	0	0	0	0	0	0	0	0	0	0	0	0	0	0	0	0	0	0	0	0	0	0	0	0	0	0	0	0	0	0	0	0	0	0	0
		Secondary macroporosity					4.33333	15.4605	1.96721	1	3.32226	0.333333	9.63455	1	4.94297	2.77778	1.33333	2.38908	11.1486	13	5.66667	7.33333	14.3333	8.25083	5.64601	10.299	8.66667	8.52459	9.30233	11	10	9	2.65781	3.33333	25.3333	5.61404	2.33333	6.97674	14.8867	5.33333	6.35452	4.66667	4.9505	4.33333	2.66667	0.323862	1	0	0
			Intercrystalline				0.666667	1.31579	0	0	0.332226	0	0.664452	0	0	0.308642	0	1.02389	7.09459	5.33333	1.66667	2.33333	1.66667	0.990099	0.334448	0.996678	1	1.31148	0.996678	0.666667	3	1	0.664452	0.333333	1	1.05263	0.333333	1.3289	7.76699	2.33333	2.67559	0	0.660066	0.333333	1.66667	0	0	0	0
			Mouldic				0	0.986842	0	0	0	0	0.332226	0	1.3308	0	0	0	0.337838	0	0	0	0.666667	0	0	0	0	0	0	0	0	0	0	0	0	0	0	0	0.323625	0	0	0	0	0	0	0	0	0	0
				Isolated			0	0.986842	0	0	0	0	0.332226	0	0.380228	0	0	0	0.337838	0	0	0	0.666667	0	0	0	0	0	0	0	0	0	0	0	0	0	0	0	0.323625	0	0	0	0	0	0	0	0	0	0
				Connected			0	0	0	0	0	0	0	0	0.95057	0	0	0	0	0	0	0	0	0	0	0	0	0	0	0	0	0	0	0	0	0	0	0	0	0	0	0	0	0	0	0	0	0	0
			Vugs				3	12.5	1.63934	0	1.99336	0.333333	8.30565	1	2.6616	1.54321	1	1.36519	2.36486	6.33333	4	5	12	7.26073	4.64707	9.30233	6.66667	6.22951	4.31894	7.66667	7	7.66667	1.3289	2.66667	22.3333	4.5614	1.33333	3.98671	6.47249	1.33333	3.01003	4.66667	2.64026	1.66667	0.333333	0	0	0	0
				Isolated			1.33333	10.1974	1.63934	0	1.99336	0.333333	4.98339	1	1.14068	1.54321	0.666667	1.36519	2.02703	5	2.66667	4.66667	8.33333	4.62046	4.31262	7.30897	4.33333	4.91803	2.32558	3.66667	4	4.66667	0.996678	2.33333	5	2.80702	0.666667	2.65781	4.85437	1.33333	2.67559	2.66667	1.65017	1.66667	0.333333	0	0	0	0
				Touching			1.66667	2.30263	0	0	0	0	3.32226	0	1.52091	0	0.333333	0	0.337838	1.33333	1.33333	0.333333	3.66667	2.64026	0.334448	1.99336	2.33333	1.31148	1.99336	4	3	3	0.332226	0.333333	17.3333	1.75439	0.666667	1.3289	1.61812	0	0.334448	2	0.990099	0	0	0	0	0	0
			Secondary intraparticle				0	0.328947	0	0	0.332226	0	0	0	0	0.617284	0	0	0	0	0	0	0	0	0	0	0	0	0	0	0	0.333333	0.664452	0	0.333333	0	0	1.3289	0	0	0	0	0	1	0	0.323862	0	0	0
			Fractures (macroporosity)				0.666667	0.328947	0.327869	1	0.664452	0	0	0	0.380228	0.308642	0.333333	0	0.337838	1	0	0	0	0	0.330048	0	0.333333	0.655738	3.65449	1.33333	0	0	0	0.333333	0.666667	0	0.333333	0	0	0.666667	0	0	1.32013	1	0.333333	0	1	0	0
			Channel				0	0	0	0	0	0	0.332226	0	0.570342	0	0	0	1.01351	0.333333	0	0	0	0	0.334448	0	0.666667	0.327869	0.332226	1.33333	0	0	0	0	1	0	0.333333	0.332226	0.323625	1	0.668896	0	0.330033	0.333333	0.333333	0	0	0	0
[truncated: 2 more columns]

## Sheet: G-4H1
X	X	X	X	X	X	I	G4-1	G4-2	G4-3A	G4-3B	G4-4	G4-5	G4-6	G4-7	G4-8	G4-9	G4-10A	G4-10B	G4-11	G4-12	G4-13	G4-14	G4-15	G4-16	G4-17	G4-18	G4-19	G4-20	G4-21	G4-22	G4-23	G4-24	G4-25	G4-26	G4-27	G4-28	G4-29	G4-30	G4-31	G4-32	G4-33	G4-34	G4-35	G4-36	G4-37
	Sequence						5	5	4	4	4	4	4	4	4	4	4	4	4	4	3	3	3	3	2	2	2	2	2	2	2	2	2	2	2	1	1	1	1	1	1	1	1	1	1
	depth (m dd DFE)						4941.44	4943.26	4946.15	4946.15	4948.68	4950.9	4953.33	4956.15	4958.54	4960.27	4963.54	4963.54	4965.94	4968.2	4971.15	4973.71	4976.13	4978.49	4981.14	4983.46	4986.1	4988.25	4991.3	4993.52	4995.93	4998.5	5000	5001.39	5003.26	5005.6	5008.57	5011.4	5013.49	5014.23	5018.51	5021.12	5023.42	5026.17	5031.25
	Allochems (cryptocrystalline calcite)						0	0	0	0	0	0		0	0	0	0	0	0	0	0	0	0	0	0	0	0	0	0	0	0	0	0	0	0	0	0	0	0	0	0	0	0	0	0
		Skeletal allochems (calcite)					0	0	0	0	0	0	XXXXX	0	0	0	0	0	0	0	0	0	0	0	0	0	0	0	0	0	0	0	0	0	0	0	0	0	0	0	0	0	0	0	0
		Non-skeletal allochems (calcite)					0	0	0	0	0	0	XXXXX	0	0	0	0	0	0	0	0	0	0	0	0	0	0	0	0	0	0	0	0	0	0	0	0	0	0	0	0	0	0	0	0
	Matrix (cryptocrystalline calcite)						0	0	0	0	0	0		0	0	0	0	0	0	0	0	0	0	0	0	0	0	0	0	0	0	0	0	0	0	0	0	0	0	0	0	0	0	0	0
		Micrite (calcite)					0	0	0	0	0	0		0	0	0	0	0	0	0	0	0	0	0	0	0	0	0	0	0	0	0	0	0	0	0	0	0	0	0	0	0	0	0	0
	Allochems (cryptocrystalline dolomite)						0	0	0	0	0	0		4	0	0	6	10	0	0	0	0	0	0	0	0	0	2.66667	0	0	0	0	0	0	0	0	0	0	0	0	0	0	0	0	0
		Skeletal allochems (dolomite)					0	0	0	0	0	0		2	0	0	6	10	0	0	0	0	0	0	0	0	0	2.66667	0	0	0	0	0	0	0	0	0	0	0	0	0	0	0	0	0
		Non-skeletal allochems (dolomite)					0	0	0	0	0	0		2	0	0	0	0	0	0	0	0	0	0	0	0	0	0	0	0	0	0	0	0	0	0	0	0	0	0	0	0	0	0	0
	Matrix (cryptocrystalline dolomite)						0	0	0	0	0	0		0	0	0	0	0	0	0	0	0	0	0	0	0	0	0	0	0	0	0	0	0	0	0	0	0	0	0	0	0	0	0	0
		Micrite					0	0	0	0	0	0		0	0	0	0	0	0	0	0	0	0	0	0	0	0	0	0	0	0	0	0	0	0	0	0	0	0	0	0	0	0	0	0
	Total replacive dolomite						66	32	65.7895	88	78.6667	60		74	62	74.6667	54	12	76.6667	62	88.7417	57.3333	59.3333	71.3333	52.5974	12	26.4901	78.6667	33.1126	45.8065	4	69.281	1.36986	58	9.33333	74.8344	41.3333	77.3006	72.8477	52	55.3333	52	72.6667	38.6667	72.6667
		Microcrystalline dolomite					8	2.66667	9.86842	27.3333	27.3333	4		65.3333	20.6667	3.33333	0.666667	0.666667	8	8.66667	11.2583	5.33333	3.33333	9.33333	2.5974	5.33333	13.9073	6	3.31126	1.93548	0	4.57516	0	1.33333	0	2.64901	0	2.45399	0	0	0	0.666667	4	0	1.33333
		Planar dolomite					16	6	9.21053	14	15.3333	10		2.66667	8	12.6667	4	0	10.6667	14	9.93377	11.3333	10.6667	20	9.74026	0.666667	1.98675	4	6.62252	7.74194	1.33333	16.9935	0	16	4.66667	13.245	6.66667	13.4969	19.8675	11.3333	13.3333	4.66667	9.33333	11.3333	11.3333
			Planar-s				12.6667	1.33333	1.31579	6	10	8		0	3.33333	12	3.33333	0	10.6667	14	9.27152	10	10.6667	20	6.49351	0	0	3.33333	5.96026	5.80645	0.666667	13.0719	0	11.3333	0.666667	11.2583	5.33333	12.2699	18.543	8	11.3333	4.66667	8.66667	8	7.33333
			Planar-e				3.33333	4	7.89474	4	3.33333	2		0	4.66667	0.666667	0.666667	0	0	0	0.662252	1.33333	0	0	1.94805	0	0	0.666667	0.662252	1.29032	0	3.92157	0	4.66667	1.33333	1.98675	0	1.22699	1.3245	0.666667	0.666667	0	0.666667	3.33333	4
			Planar-p				0	0.666667	0	4	2	0		2.66667	0	0	0	0	0	0	0	0	0	0	1.2987	0.666667	1.98675	0	0	0.645161	0.666667	0	0	0	2.66667	0	1.33333	0	0	2.66667	1.33333	0	0	0	0
		Non-planar dolomite					42	23.3333	46.7105	46.6667	36	46		6	33.3333	58.6667	49.3333	11.3333	58	39.3333	67.5497	40.6667	45.3333	42	40.2597	6	10.596	68.6667	23.1788	36.129	2.66667	47.7124	1.36986	40.6667	4.66667	58.9404	34.6667	61.3497	52.9801	40.6667	42	46.6667	59.3333	27.3333	60
			Non-planar-a				41.3333	15.3333	44.7368	40.6667	30.6667	46		1.33333	32.6667	58.6667	49.3333	11.3333	58	39.3333	67.5497	40.6667	45.3333	42	39.6104	4	3.97351	68.6667	21.1921	30.9677	0	47.7124	0	40.6667	0.666667	58.9404	34.6667	61.3497	52.9801	39.3333	40	46.6667	59.3333	27.3333	60
			Non-planar-p				0.666667	8	1.97368	6	5.33333	0		4.66667	0.666667	0	0	0	0	0	0	0	0	0	0.649351	2	6.62252	0	1.98675	5.16129	2.66667	0	1.36986	0	4	0	0	0	0	1.33333	2	0	0	0	0
			Saddle dolomite				0	0	0	0	0	0		0	0	0	0	0	0	0	0	0	0	0	0	0	0	0	0	0	0	0	0	0	0	0	0	0	0	0	0	0	0	0	0
	Dolomite cements						0	0	0	0	0	0		0	0	0	0	0	0	0	0	0	0	0.666667	0	0	0	0	0	0	0	0	0	0	0	0.662252	0	0	0	0	0	0	0	0	0
		Pore-filling planar					0	0	0	0	0	0		0	0	0	0	0	0	0	0	0	0	0	0	0	0	0	0	0	0	0	0	0	0	0.662252	0	0	0	0	0	0	0	0	0
		Pore-filling non-planar					0	0	0	0	0	0		0	0	0	0	0	0	0	0	0	0	0.666667	0	0	0	0	0	0	0	0	0	0	0	0	0	0	0	0	0	0	0	0	0
		Overgrowth					0	0	0	0	0	0		0	0	0	0	0	0	0	0	0	0	0	0	0	0	0	0	0	0	0	0	0	0	0	0	0	0	0	0	0	0	0	0
		Fracture-filling					0	0	0	0	0	0		0	0	0	0	0	0	0	0	0	0	0	0	0	0	0	0	0	0	0	0	0	0	0	0	0	0	0	0	0	0	0	0
	Gypsum/Anhydrite						27.3333	60.6667	33.5526	10	16	30		17.3333	25.3333	6.66667	28.6667	73.3333	10	10.6667	2.64901	29.3333	10	6.66667	13.6364	80.6667	67.5497	6.66667	3.31126	14.1935	23.3333	13.0719	22.8311	13.3333	12.6667	4.63576	0	8.58896	8.60927	5.33333	36.6667	38	14.6667	51.3333	15.3333
		Replacive laths					19.3333	57.3333	14.4737	6.66667	14	28.6667		9.33333	21.3333	5.33333	10	4	7.33333	3.33333	0.662252	20.6667	6	3.33333	6.49351	80	65.5629	0.666667	2.64901	1.29032	14.6667	7.18954	19.1781	7.33333	6	2.64901	0	3.68098	3.31126	1.33333	26	30.6667	8	49.3333	12
		Replacive/displacive nodules					0	0	15.7895	0	0	0		0	0	0	0	0	0	0	0	0	0	0	0	0.666667	0	0	0	0	0	0	0	0	0	0	0	0	0	0	1.33333	0	0	0	0
		Pore filling					8	3.33333	1.97368	0	2	1.33333		6	4	1.33333	2	2	2.66667	7.33333	1.3245	8.66667	4	3.33333	7.14286	0	1.98675	6	0.662252	12.9032	8	5.88235	3.65297	6	6.66667	1.3245	0	4.90798	4.63576	4	9.33333	7.33333	6.66667	2	2.66667
		Fracture-filling					0	0	1.31579	3.33333	0	0		2	0	0	16.6667	67.3333	0	0	0.662252	0	0	0	0	0	0	0	0	0	0.666667	0	0	0	0	0.662252	0	0	0.662252	0	0	0	0	0	0.666667
	Halite						0.666667	0.666667	0	0	0	0		0	0	0	0	0	0	0	0	0.666667	0	0	3.24675	1.33333	1.3245	0	1.3245	0	0	0.653595	0.456621	0	0	0	0	0	0	0	0	0	0	0	0
		Replacive					0	0	0	0	0	0		0	0	0	0	0	0	0	0	0	0	0	0	0	0	0	0	0	0	0	0	0	0	0	0	0	0	0	0	0	0	0	0
		Pore filling					0.666667	0.666667	0	0	0	0		0	0	0	0	0	0	0	0	0.666667	0	0	3.24675	1.33333	1.3245	0	1.3245	0	0	0.653595	0.456621	0	0	0	0	0	0	0	0	0	0	0	0
		Fracture-filling					0	0	0	0	0	0		0	0	0	0	0	0	0	0	0	0	0	0	0	0	0	0	0	0	0	0	0	0	0	0	0	0	0	0	0	0	0	0
	Calcite						0	0	0	0	0	0		0	0	2.66667	0.666667	0	0	0	0	0	0	0	12.987	1.33333	0	4	39.7351	31.6129	61.3333	0	64.8402	1.33333	54.6667	11.9205	0	0	3.97351	31.3333	0	0	0	0	0
		Neomorphic/Replacive (D-dolomite)					0	0	0	0	0	0		0	0	0	0	0	0	0	0	0	0	0	9.74026	0	0	0.666667	38.4106	20.6452	60	0	64.3836	0	54	0	0	0	0	20.6667	0	0	0	0	0
		Pore-filling					0	0	0	0	0	0		0	0	0.666667	0.666667	0	0	0	0	0	0	0	3.24675	1.33333	0	3.33333	1.3245	10.9677	1.33333	0	0	1.33333	0.666667	11.2583	0	0	2.64901	6	0	0	0	0	0
		Fracture-filling					0	0	0	0	0	0		0	0	2	0	0	0	0	0	0	0	0	0	0	0	0	0	0	0	0	0.456621	0	0	0.662252	0	0	1.3245	4.66667	0	0	0	0	0
	Quartz						0	0	0	0.666667	0	0		0	0	0.666667	0	0	0	0	0	0	0	0	0	0	0	0	0	0	0	0	0	0	0	0	34.6667	0	0	0.666667	0	0	0	0	0
		Replacive					0	0	0	0.666667	0	0		0	0	0.666667	0	0	0	0	0	0	0	0	0	0	0	0	0	0	0	0	0	0	0	0	34.6667	0	0	0	0	0	0	0	0
		Pore-filling					0	0	0	0	0	0		0	0	0	0	0	0	0	0	0	0	0	0	0	0	0	0	0	0	0	0	0	0	0	0	0	0	0	0	0	0	0	0
		Fracture-filling					0	0	0	0	0	0		0	0	0	0	0	0	0	0	0	0	0	0	0	0	0	0	0	0	0	0	0	0	0	0	0	0	0.666667	0	0	0	0	0
	Pyrite						0	0	0	0	0	0		0	0	0	0	0	0	0	0	0	0	0	0	0	0	0	0	0	0	0	0	0	0	0	0	0	0	0	0	0	0	0	0
		Replacive					0	0	0	0	0	0		0	0	0	0	0	0	0	0	0	0	0	0	0	0	0	0	0	0	0	0	0	0	0	0	0	0	0	0	0	0	0	0
		Cement					0	0	0	0	0	0		0	0	0	0	0	0	0	0	0	0	0	0	0	0	0	0	0	0	0	0	0	0	0	0	0	0	0	0	0	0	0	0
	Residual hydrocarbon						4.66667	3.33333	0	0	3.33333	8.66667		2	3.33333	2.66667	4	4	4.66667	7.33333	5.29801	1.33333	5.33333	4	7.14286	2.66667	3.97351	6	3.97351	8.3871	5.33333	5.88235	5.93607	14.6667	7.33333	3.97351	22.6667	8.58896	10.596	8	7.33333	9.33333	8.66667	6	10.6667
		Pore Filling					4	2	0	0	2	6		0.666667	2	1.33333	1.33333	1.33333	2.66667	4.66667	2.64901	0.666667	2	1.33333	1.94805	1.33333	1.3245	4.66667	2.64901	4.51613	2	4.57516	3.65297	6.66667	5.33333	1.98675	18.6667	6.13497	9.27152	6	4	6.66667	6.66667	5.33333	6.66667
		Grain Rimming					0.666667	1.33333	0	0	1.33333	2.66667		0.666667	1.33333	1.33333	2.66667	1.33333	2	2.66667	1.3245	0	3.33333	2.66667	5.19481	1.33333	2.64901	1.33333	1.3245	1.29032	2	1.30719	0.913242	6.66667	2	1.98675	3.33333	2.45399	0.662252	2	3.33333	2.66667	1.33333	0.666667	3.33333
		Fracture Filling					0	0	0	0	0	0		0.666667	0	0	0	0	0	0	0	0	0	0	0	0	0	0	0	0	0.666667	0	0	1.33333	0	0	0.666667	0	0	0	0	0	0.666667	0	0
		Stylolite					0	0	0	0	0	0		0	0	0	0	1.33333	0	0	1.3245	0.666667	0	0	0	0	0	0	0	2.58065	0.666667	0	1.36986	0	0	0	0	0	0.662252	0	0	0	0	0	0.666667
	Total modal porosity						1.33333	3.33333	0.657895	1.33333	2	1.33333		2.66667	9.33333	12.6667	6.66667	0.666667	8.66667	20	3.31126	11.3333	25.3333	17.3333	10.3896	2	0.662252	2	18.543	0	6	11.1111	4.56621	12.6667	16	3.97351	1.33333	5.52147	3.97351	2.66667	0.666667	0.666667	4	4	1.33333
		Primary macroporosity					0	0	0	0	0	0		0	0	0	0	0	0	0	0	0	0	0	0	0	0	0	0	0	0	0	0	0	0	0	0	0	0	0	0	0	0	0	0
			Primary interparticle				0	0	0	0	0	0		0	0	0	0	0	0	0	0	0	0	0	0	0	0	0	0	0	0	0	0	0	0	0	0	0	0	0	0	0	0	0	0
			Fenestral				0	0	0	0	0	0		0	0	0	0	0	0	0	0	0	0	0	0	0	0	0	0	0	0	0	0	0	0	0	0	0	0	0	0	0	0	0	0
			Primary intraparticle				0	0	0	0	0	0		0	0	0	0	0	0	0	0	0	0	0	0	0	0	0	0	0	0	0	0	0	0	0	0	0	0	0	0	0	0	0	0
		Secondary macroporosity					1.33333	3.33333	0.657895	1.33333	2	1.33333		2.66667	9.33333	12.6667	6.66667	0.666667	8.66667	20	3.31126	11.3333	25.3333	17.3333	10.3896	2	0.662252	2	18.543	0	6	11.1111	4.56621	12.6667	16	3.97351	1.33333	5.52147	3.97351	2.66667	0.666667	0.666667	4	4	1.33333
			Intercrystalline				0	0	0	0	0	0		0	0	0	0	0	0	0	0	2	1.33333	0	0	0	0	0	0	0	0	1.30719	0	0	0	0	0	0	0	0	0	0	0.666667	0.666667	0
			Mouldic				0	0	0	0	0	0		0	0	0	0	0	0.666667	0	0	0	0	0	0	0	0	0	6.62252	0	0	0	0	0	0	0	0	0	0	0	0	0	0	0	0
				Isolated			0	0	0	0	0	0		0	0	0	0	0	0.666667	0	0	0	0	0	0	0	0	0	6.62252	0	0	0	0	0	0	0	0	0	0	0	0	0	0	0	0
				Connected			0	0	0	0	0	0		0	0	0	0	0	0	0	0	0	0	0	0	0	0	0	0	0	0	0	0	0	0	0	0	0	0	0	0	0	0	0	0
			Vugs				1.33333	2	0.657895	0	2	1.33333		0.666667	6	9.33333	6.66667	0.666667	7.33333	18.6667	1.3245	8.66667	24	17.3333	9.74026	2	0.662252	2	11.2583	0	4.66667	9.15033	2.73973	12.6667	16	3.31126	1.33333	3.68098	2.64901	2	0	0.666667	2	1.33333	0
				Isolated			1.33333	2	0	0	2	1.33333		0.666667	5.33333	6.66667	6	0.666667	5.33333	17.3333	1.3245	6.66667	12	6.66667	1.94805	2	0.662252	2	8.60927	0	4.66667	7.84314	2.73973	10.6667	10.6667	3.31126	1.33333	1.84049	2.64901	1.33333	0	0.666667	2	1.33333	0
				Touching			0	0	0.657895	0	0	0		0	0.666667	2.66667	0.666667	0	2	1.33333	0	2	12	10.6667	7.79221	0	0	0	2.64901	0	0	1.30719	0	2	5.33333	0	0	1.84049	0	0.666667	0	0	0	0	0
			Secondary intraparticle				0	0	0	0	0	0		0	0	0	0	0	0	0	0	0	0	0	0	0	0	0	0	0	0	0	0	0	0	0	0	0	0	0	0	0	0.666667	0	0
			Fractures (macroporosity)				0	0	0	1.33333	0	0		2	3.33333	1.33333	0	0	0	0	1.3245	0.666667	0	0	0	0	0	0	0.662252	0	1.33333	0	1.82648	0	0	0.662252	0	1.84049	0.662252	0	0.666667	0	0.666667	0.666667	0.666667
			Channel				0	1.33333	0	0	0	0		0	0	2	0	0	0.666667	1.33333	0.662252	0	0	0	0.649351	0	0	0	0	0	0	0.653595	0	0	0	0	0	0	0.662252	0.666667	0	0	0	1.33333	0.666667

## Sheet: G-8H1
X	X	X	X	X	X	I	G8-1	G8-2	G8-3	G8-4	G8-5	G8-6	G8-7	G8-8	G8-9	G8-10	G8-11	G8-12	G8-13	G8-14	G8-15	G8-16	G8-17	G8-18	G8-19	G8-20	G8-21	G8-22	G8-23	G8-24	G8-25	G8-26	G8-27	G8-28	G8-29	G8-30	G8-31	G8-32	G8-33	G8-34
	Sequence						5	5	5	5	5	5	5	5	5	5	5	4	4	4	4	4	4	4	4	3	3	3	3	2	2	2	2	2	2	2	2	2	2	2
	depth (m dd DFE)						4949.19	4951.33	4954.09	4954.91	4956.42	4959.18	4961.2	4964.12	4966.5	4969.13	4971.57	4974.1	4976.16	4979.13	4981.5	4984.2	4986.52	4987.45	4989.16	4994.13	4996.48	4999.29	5001.52	5004.04	5006.46	5008.83	5011.52	5014.12	5016.37	5019.04	5021.42	5024.05	5026.45	5029.14
	Allochems (cryptocrystalline calcite)						0	0	0	0	0	0	0	0	0	0	0	0	0	0	0	0	0	0	0	0	0	0	0	0	0	0	0	0	0	0	0	0	0	0
		Skeletal allochems (calcite)					0	0	0	0	0	0	0	0	0	0	0	0	0	0	0	0	0	0	0	0	0	0	0	0	0	0	0	0	0	0	0	0	0	0
		Non-skeletal allochems (calcite)					0	0	0	0	0	0	0	0	0	0	0	0	0	0	0	0	0	0	0	0	0	0	0	0	0	0	0	0	0	0	0	0	0	0
	Matrix (cryptocrystalline calcite)						0	1.86714	0	0	0	0	0	0	0	0	0	0	0	0	0	0	0	0	0	0	0	0	0	0	0	0	0	0	0	1.19227	0	0	0.8967	0
		Micrite (calcite)					0	1.86714	0	0	0	0	0	0	0	0	0	0	0	0	0	0	0	0	0	0	0	0	0	0	0	0	0	0	0	1.19227	0	0	0.8967	0
	Allochems (cryptocrystalline dolomite)						0	0	0	0	0	0	0	0	0	0	0.617284	1.33333	0	0	0	0	0	0	0	0	4.9948	15.6146	6.52481	0.966472	1.6667	1.33333	0.333333	0	0.333333	0.302043	0	0	0	0.319293
		Skeletal allochems (dolomite)					0	0	0	0	0	0	0	0	0	0	0	0	0	0	0	0	0	0	0	0	0	0	0	0	0	0	0	0	0	0	0	0	0	0
		Non-skeletal allochems (dolomite)					0	0	0	0	0	0	0	0	0	0	0.617284	1.33333	0	0	0	0	0	0	0	0	4.9948	15.6146	6.52481	0.966472	1.6667	1.33333	0.333333	0	0.333333	0.302043	0	0	0	0.319293
	Matrix (cryptocrystalline dolomite)						8.34923	8.30671	0	0	0.333333	0.333333	8.70968	0.666667	3.93443	7	16.6667	12.6667	0	2.33333	11.6279	4.62046	0	0	1.66667	2	12.6535	4.98339	5.57377	3.54373	3.66675	3	3.33333	15.9159	0	16.9144	0	0	14.939	0.319293
		Micrite					8.34923	8.30671	0	0	0.333333	0.333333	8.70968	0.666667	3.93443	7	16.6667	12.6667	0	2.33333	11.6279	4.62046	0	0	1.66667	2	12.6535	4.98339	5.57377	3.54373	3.66675	3	3.33333	15.9159	0	16.9144	0	0	14.939	0.319293
	Total replacive dolomite						22.231	61.3626	32.6783	62.864	86.6667	80.902	65.4839	62.7564	74.0984	72.6667	66.8145	65.3333	71.6667	70.6667	66.7774	67.2967	76.8248	76	77.6667	20.5982	60.82	48.1728	65.6563	58.2198	50.538	73.8431	89	74.61	79.6667	71.0953	2.31099	76.7506	59.4333	79.9438
		Microcrystalline dolomite					8.00135	12.5804	0.723224	0	1.66667	6.31373	0.967742	0	1.63934	9.33333	9.09407	21.3333	4	4	6.31229	5.23767	0.990099	1	3	6.62914	12.416	7.30897	8.79383	2.2551	24.3988	3.29412	3.66667	17.9704	4	7.17749	0	0.662252	7.2274	0.319293
		Planar dolomite					1.00999	5.00394	9.68264	10.6184	7.66667	6.2549	8.3871	7.4359	5.90164	10	3.8602	5.66667	7.66667	9.66667	10.299	10.3382	6.48065	7	4.66667	0	2.58966	6.64452	11.0976	9.71874	2.67568	2.97386	3.33333	2.52325	5.33333	7.78158	0.330142	10.6137	6.0318	19.7962
			Planar-s				1.00999	4.38156	5.73345	10.6184	7.66667	5.60131	8.3871	6.46154	5.90164	9.66667	1.9214	3	7.66667	9.66667	8.63787	7.115	6.48065	7	4.66667	0	2.58966	6.64452	11.0976	7.52923	0.335578	2.97386	3.33333	2.24859	5.33333	4.79294	0	10.6137	4.83022	19.7962
			Planar-e				0	0.622381	1.07056	0	0	0.653595	0	0.333333	0	0.333333	0.978091	1.33333	0	0	0.664452	2.90172	0	0	0	0	0	0	0	0.578726	0.671156	0	0	0.274665	0	1.78841	0	0	0.5978	0
			Planar-p				0	0	2.87862	0	0	0	0	0.641026	0	0	0.960702	1.33333	0	0	0.996678	0.321461	0	0	0	0	0	0	0	1.61079	1.66894	0	0	0	0	1.20022	0.330142	0	0.603778	0
		Non-planar dolomite					13.2196	43.7783	22.2724	52.2456	77.3333	68.3333	56.129	55.3205	66.5574	53.3333	53.8602	38.3333	60	57	50.1661	51.7209	69.3541	68	70	13.9691	45.8143	34.2193	45.7648	46.246	23.4636	67.5752	82	54.1163	70.3333	56.1362	1.98085	65.4746	46.1741	59.8283
			Non-planar-a				8.34923	43.7783	20.1218	52.2456	77.3333	68.3333	56.129	53.7179	66.5574	52.3333	47.1701	28.3333	59.6667	57	47.1761	50.0707	69.3541	68	70	8.64901	45.8143	34.2193	45.7648	43.4778	20.7879	67.5752	82	54.1163	70	52.2097	0.660284	65.4746	42.5335	59.8283
			Non-planar-p				4.87038	0	2.15064	0	0	0	0	1.60256	0	1	6.69014	10	0.333333	0	2.99003	1.65017	0	0	0	5.32009	0	0	0	2.76824	2.67568	0	0	0	0.333333	3.92656	1.32057	0	3.6406	0
			Saddle dolomite				0	0	0	0	0	0	0	0	0	0	0	0	0	0	0	0	0	0	0	0	0	0	0	0	0	0	0	0	0	0	0	0	0	0
	Dolomite cements						0	4.79233	3.97773	6.33333	1.33333	1.33333	3.22581	1.66667	5.2459	0	0.32603	2.33333	3.66667	4.66667	7.30897	2.64026	4.9505	2.66667	0	0	7.99169	6.31229	4.91803	2.2551	0.335578	1.33333	0.333333	0	1	0.302043	0	3.33333	0.609756	1.59646
		Pore-filling planar					0	4.15335	3.61612	4	0.666667	1	2.90323	1.33333	3.60656	0	0.32603	0	3	1.66667	1.3289	2.64026	2.64026	2	0	0	0.665974	4.65116	3.60656	1.61079	0.335578	0.333333	0	0	0.666667	0	0	2.66667	0.609756	1.59646
		Pore-filling non-planar					0	0.638978	0.361612	2.33333	0.666667	0.333333	0.322581	0.333333	1.63934	0	0	0	0.666667	3	5.98007	0	1.9802	0.666667	0	0	4.66182	0.996678	1.31148	0	0	0.333333	0	0	0	0	0	0.666667	0	0
		Overgrowth					0	0	0	0	0	0	0	0	0	0	0	2.33333	0	0	0	0	0.330033	0	0	0	2.6639	0.664452	0	0.644315	0	0.666667	0.333333	0	0.333333	0.302043	0	0	0	0
		Fracture-filling					0	0	0	0	0	0	0	0	0	0	0	0	0	0	0	0	0	0	0	0	0	0	0	0	0	0	0	0	0	0	0	0	0	0
	Gypsum/Anhydrite						3.11974	3.44799	4.70096	5.62719	1.66667	9.86275	1.93548	23.5	4.2623	10	13.9454	15	15.6667	6.33333	5.31561	0.651494	3.24032	3	5.33333	1.99558	7.39146	11.6279	1.62849	6.04962	21.4143	10.2353	0.666667	4.62536	11.3333	2.69851	94.053	9.61589	16.0091	1.58589
		Replacive laths					1.73942	1.55595	3.25451	0.328947	0.666667	4.91503	0.645161	12.2308	1.63934	5.33333	7.70301	7	7.66667	5.66667	3.98671	0.321461	0.964382	1.66667	1.66667	0.995585	2.57482	5.31561	0	2.99201	13.0786	6.92157	0.333333	1.92265	5.66667	1.79239	0	6.2936	7.48446	0.951535
		Replacive/displacive nodules					0.336663	0.958466	0	1	0	0	0	4.33333	0	0.333333	3.08642	7	4.33333	0	0	0	0.321461	0	0.333333	0	1.90884	2.65781	0	0.289363	7.3335	0.666667	0	1.5015	4.33333	0.604086	94.053	0	6.09158	0
		Pore filling					1.04365	0.933571	1.44645	3.64035	1	4.94771	1.29032	6.9359	2.62295	4.33333	3.15597	1	3.66667	0.666667	1.3289	0.330033	1.95448	1.33333	3	1	1.95338	3.65449	1.62849	2.76824	1.00226	2.64706	0.333333	1.2012	1.33333	0.302043	0	0.997792	0.908656	0.634357
		Fracture-filling					0	0	0	0	0	0	0	0	0	0	0	0	0	0	0	0	0	0	0	0	0	0	0	0	0	0	0	0	0	0	0	0	0	0
	Halite						2.78308	0.319489	2.16016	0	0	0	0.645161	0.641026	0	0	0	0	0	1.66667	0	0	0.330033	3.66667	0	0	0	0.664452	0	0	0	0	0	0	0	0	0	0	0	0
		Replacive					0	0	0	0	0	0	0	0	0	0	0	0	0	0	0	0	0	0	0	0	0	0	0	0	0	0	0	0	0	0	0	0	0	0
		Pore filling					2.78308	0.319489	2.16016	0	0	0	0.645161	0.641026	0	0	0	0	0	1.66667	0	0	0.330033	2.33333	0	0	0	0.664452	0	0	0	0	0	0	0	0	0	0	0	0
		Fracture-filling					0	0	0	0	0	0	0	0	0	0	0	0	0	0	0	0	0	1.33333	0	0	0	0	0	0	0	0	0	0	0	0	0	0	0	0
	Calcite						3.41151	8.8544	0	0	0	0	0	0	0	5.33333	0	0	1.66667	5	3.65449	14.0371	0	0	6	71.4216	0.651127	0	0	0.644315	19.025	0	0	0	0	0	0	0	0.304878	0
		Neomorphic/Replacive (D-dolomite)					3.41151	5.65952	0	0	0	0	0	0	0	2	0	0	0.666667	2	0.664452	6.16776	0	0	2	64.4216	0	0	0	0.322157	7.67802	0	0	0	0	0	0	0	0	0
		Pore-filling					0	3.19489	0	0	0	0	0	0	0	3.33333	0	0	1	3	2.99003	7.21786	0	0	3.33333	7	0.651127	0	0	0.322157	11.0137	0	0	0	0	0	0	0	0	0
		Fracture-filling					0	0	0	0	0	0	0	0	0	0	0	0	0	0	0	0.651494	0	0	0.666667	0	0	0	0	0	0.333341	0	0	0	0	0	0	0	0.304878	0
	Quartz						50.1066	0	42.1183	0	0	0	0	0	0.327869	0	0	0	0	0	0	0	0	0	0	0	0	4.31894	5.88861	20.2786	0	0	0	0	0	0	0	0	0	0
		Replacive					50.1066	0	27.6538	0	0	0	0	0	0	0	0	0	0	0	0	0	0	0	0	0	0	2.99003	4.57714	14.1576	0	0	0	0	0	0	0	0	0	0
		Pore-filling					0	0	14.4645	0	0	0	0	0	0.327869	0	0	0	0	0	0	0	0	0	0	0	0	0.664452	1.31148	6.12099	0	0	0	0	0	0	0	0	0	0
		Fracture-filling					0	0	0	0	0	0	0	0	0	0	0	0	0	0	0	0	0	0	0	0	0	0.664452	0	0	0	0	0	0	0	0	0	0	0	0
	Pyrite						0.347885	0	0	0	0	0	0	0	0	0	0	0	0	0	0	0	0	0	0	0	0	0	0	0	0	0	0	0	0	0	0	0	0	0
		Replacive					0.347885	0	0	0	0	0	0	0	0	0	0	0	0	0	0	0	0	0	0	0	0	0	0	0	0	0	0	0	0	0	0	0	0	0
		Cement					0	0	0	0	0	0	0	0	0	0	0	0	0	0	0	0	0	0	0	0	0	0	0	0	0	0	0	0	0	0	0	0	0	0
	Residual hydrocarbon						2.71574	1.86714	2.16967	3.94737	1.66667	1.96732	4.19355	3.57692	3.93443	4.66667	1.63015	1	0.333333	0.666667	0.996678	9.78955	6.85354	2	6	2.65342	3.86222	2.32558	3.59353	3.24858	1.34231	3.98693	6.33333	2.77228	1.33333	1.49432	2.31099	3.98234	6.91057	2.54377
		Pore Filling					1.69453	0.933571	1.08484	2.63158	1	1.31373	2.25806	1.28205	2.62295	2	1.30412	0.333333	0.333333	0.333333	0.332226	4.23042	3.59607	1	3	0.331126	2.58966	0.996678	1.95853	1.15745	0.335578	1.66667	4	2.22295	1.33333	0	1.65071	2.65563	2.40316	0.951535
		Grain Rimming					0.336663	0.622381	0.361612	0.657895	0.666667	0.326797	1.6129	1.97436	0.655738	0.666667	0.32603	0.666667	0	0	0.664452	2.30166	2.93601	0.666667	2.33333	0.664459	0.954421	0	1.30713	1.44682	1.00673	2.32026	2.33333	0.54933	0	1.49432	0.660284	0.995585	2.41511	1.27506
		Fracture Filling					0.336663	0.31119	0	0.657895	0	0.326797	0.322581	0.320513	0.327869	0.333333	0	0	0	0	0	1.62445	0.321461	0.333333	0.333333	0.331126	0.31814	0	0.327869	0	0	0	0	0	0	0	0	0.331126	2.0923	0.317178
		Stylolite					0.347885	0	0.723224	0	0	0	0	0	0.327869	1.66667	0	0	0	0.333333	0	1.63302	0	0	0.333333	1.32671	0	1.3289	0	0.644315	0	0	0	0	0	0	0	0	0	0
	Total modal porosity						6.93525	9.18219	12.1949	21.2281	8.33333	5.60131	15.8065	7.19231	8.19672	0.333333	0	2.33333	7	8.66667	4.31894	0.964382	7.80078	12.6667	3.33333	1.33113	1.63524	5.98007	6.21648	4.79378	2.01123	6.26797	0	2.07647	6.33333	6.00111	1.32497	6.31788	0.8967	13.6915
		Primary macroporosity					0	0	0	0	0	0	0	0	0	0	0	0	0	0	0	0	0	0	0	0	0	0	0	0	0	0	0	0	0	0	0	0	0	0
			Primary interparticle				0	0	0	0	0	0	0	0	0	0	0	0	0	0	0	0	0	0	0	0	0	0	0	0	0	0	0	0	0	0	0	0	0	0
			Fenestral				0	0	0	0	0	0	0	0	0	0	0	0	0	0	0	0	0	0	0	0	0	0	0	0	0	0	0	0	0	0	0	0	0	0
			Primary intraparticle				0	0	0	0	0	0	0	0	0	0	0	0	0	0	0	0	0	0	0	0	0	0	0	0	0	0	0	0	0	0	0	0	0	0
		Secondary macroporosity					6.93525	9.18219	12.1949	21.2281	8.33333	5.60131	15.8065	7.19231	8.19672	0.333333	0	2.33333	7	8.66667	4.31894	0.964382	7.80078	12.6667	3.33333	1.33113	1.63524	5.98007	6.21648	4.79378	2.01123	6.26797	0	2.07647	6.33333	6.00111	1.32497	6.31788	0.8967	13.6915
			Intercrystalline				1.38032	1.59744	0.723224	0.333333	0.666667	0.333333	0	1.33333	0.327869	0	0	0	1.33333	0.333333	0.664452	0	2.62312	0.666667	0.333333	0	0.332987	1.3289	0.655738	0	0	1.33333	0	0	0.333333	0	0	0.666667	0	1.91576
			Mouldic				0.347885	0	0	0	0	0	0	0	0	0	0	0	0	0	0	0	0	0	0	0	0	1.66113	0	0	0	0.333333	0	0	1.66667	0.906128	0	0	0	0.638586
				Isolated			0.347885	0	0	0	0	0	0	0	0	0	0	0	0	0	0	0	0	0	0	0	0	1.66113	0	0	0	0.333333	0	0	1.66667	0.906128	0	0	0	0.638586
				Connected			0	0	0	0	0	0	0	0	0	0	0	0	0	0	0	0	0	0	0	0	0	0	0	0	0	0	0	0	0	0	0	0	0	0
			Vugs				4.5225	6.65118	10.0347	20.2368	6	5.26797	15.8065	5.85897	7.86885	0.333333	0	2.33333	5.66667	8.33333	3.65449	0.642921	4.8562	7.66667	2.33333	1.33113	0.969268	2.32558	5.56074	4.21505	1.34007	4.60131	0	2.07647	3.66667	5.09498	1.32497	2.98675	0.8967	10.8179
				Isolated			3.13096	2.8505	2.86911	1.98684	3.66667	4.28758	3.54839	4.55128	5.2459	0.333333	0	2.33333	4.66667	4.66667	2.65781	0.642921	4.8562	3.66667	2.33333	1.33113	0.969268	1.99336	3.9214	2.99201	1.34007	4.60131	0	0.600601	1.66667	2.3925	1.32497	2.65563	0.8967	5.40895
				Touching			1.39154	3.80067	7.16563	18.25	2.33333	0.980392	12.2581	1.30769	2.62295	0	0	0	1	3.66667	0.996678	0	0	4	0	0	0	0.332226	1.63934	1.22304	0	0	0	1.47587	2	2.70249	0	0.331126	0	5.40895
			Secondary intraparticle				0	0	0	0	0	0	0	0	0	0	0	0	0	0	0	0	0	0	0	0	0	0	0	0	0	0	0	0	0	0	0	0	0	0.319293
			Fractures (macroporosity)				0.684547	0.31119	0.718466	0.328947	0	0	0	0	0	0	0	0	0	0	0	0	0.321461	0.666667	0.666667	0	0.332987	0.664452	0	0.578726	0.671156	0	0	0	0	0	0	0.331126	0	0
			Channel				0	0.622381	0.718466	0.328947	1.66667	0	0	0	0	0	0	0	0	0	0	0.321461	0	3.66667	0	0	0	0	0	0	0	0	0	0	0.666667	0	0	2.33333	0	0
